# Supplementary material for: Loss of Ptpn11 (Shp2) drives satellite cells into quiescence
Source: eLife. 2017 May 2;6:e21552. doi: 10.7554/eLife.21552 (PMC5441871; doi:10.7554/eLife.21552)
Supplement: Supplementary file 1. — Transcripts labeled in colors are also shown in Table 1 and are associated with particular GO terms. Green: cell cycle-associated; yellow: immediate early gene; purple: extracellular matrix and matrix remodeling. FDR: false discovery rate. Corrected p-values (q-value) was determined as described (Hochberg and Benjamini, 1990). DOI: http://dx.doi.org/10.7554/eLife.21552.019 [file elife-21552-supp1.xlsx]

## Sheet: Tabelle1
Supplemental file 1
SYMBOL	Definition	p-value	FDR (stepup)	Fold-Change
Egr4	early growth response 4 (Egr4), mRNA.	2.09201e-05	0.00299571	-2.99821
Kif18a	kinesin family member 18A (Kif18a), mRNA.	7.84884e-07	0.000636711	-2.98118
Tnfrsf12a	tumor necrosis factor receptor superfamily, member 12a (Tnfrsf12a), mRNA.	5.0496e-06	0.00143794	-2.65055
Pbk	PDZ binding kinase (Pbk), mRNA.	0.000455729	0.0155111	-2.59205
Plk4	polo-like kinase 4 (Drosophila) (Plk4), mRNA.	3.38542e-06	0.00140315	-2.58729
Egr2	early growth response 2 (Egr2), mRNA.	2.34173e-05	0.00318389	-2.58008
Ccnd1	cyclin D1 (Ccnd1), mRNA.	3.17586e-05	0.00362711	-2.57708
Dek	DEK oncogene (DNA binding) (Dek), mRNA.	5.07554e-06	0.00143794	-2.57044
Plk2	polo-like kinase 2 (Drosophila) (Plk2), mRNA.	8.33827e-09	4.28537e-05	-2.53442
Clspn	claspin homolog (Xenopus laevis) (Clspn), mRNA.	9.35368e-06	0.00195416	-2.51369
Mcm10	minichromosome maintenance deficient 10 (S. cerevisiae) (Mcm10), mRNA.	0.000261413	0.0113472	-2.50754
Ndc80	NDC80 homolog, kinetochore complex component (S. cerevisiae) (Ndc80), mRNA.	2.54595e-07	0.000371838	-2.49221
C79407	expressed sequence C79407 (C79407), mRNA.	2.34565e-07	0.000371838	-2.48592
Esco2	establishment of cohesion 1 homolog 2 (S. cerevisiae) (Esco2), mRNA.	1.01521e-05	0.00203276	-2.47809
Top2a	topoisomerase (DNA) II alpha (Top2a), mRNA.	0.000302012	0.0122217	-2.45734
Iqsec3		2.69903e-05	0.0034492	-2.45336
Klhl6	kelch-like 6 (Drosophila) (Klhl6), mRNA.	4.87124e-06	0.00143794	-2.41347
Ccrn4l	CCR4 carbon catabolite repression 4-like (S. cerevisiae) (Ccrn4l), mRNA.	0.000212754	0.0097802	-2.39021
F630043A04Rik	RIKEN cDNA F630043A04 gene (F630043A04Rik), mRNA.	2.09213e-06	0.000977483	-2.36625
Ccrn4l	CCR4 carbon catabolite repression 4-like (S. cerevisiae) (Ccrn4l), mRNA.	7.29512e-05	0.00541294	-2.36468
F2rl1	coagulation factor II (thrombin) receptor-like 1 (F2rl1), mRNA.	2.06388e-05	0.00299571	-2.35733
Spag5	sperm associated antigen 5 (Spag5), mRNA.	0.000508092	0.0166324	-2.35269
Kif15	kinesin family member 15 (Kif15), mRNA.	0.000114247	0.00659731	-2.33609
Ccnb1	cyclin B1 (Ccnb1), mRNA.	4.76341e-06	0.00143794	-2.33292
5830426I05Rik	non-SMC condensin II complex, subunit G2 (Ncapg2), mRNA. XM_001003862 XM_001003868 XM_001003871 XM_001003875	1.02837e-05	0.00203276	-2.32552
Dek	DEK oncogene (DNA binding) (Dek), mRNA.	7.68066e-05	0.00552536	-2.3233
Prc1	protein regulator of cytokinesis 1 (Prc1), mRNA.	0.000443568	0.0152172	-2.32218
Sdc3	syndecan 3 (Sdc3), mRNA.	7.01692e-07	0.000601046	-2.32123
2610300B10Rik	centromere protein L (Cenpl), mRNA.	2.33547e-06	0.00105586	-2.31166
Nusap1	nucleolar and spindle associated protein 1 (Nusap1), transcript variant 2, mRNA.	0.000153174	0.00779426	-2.3003
Bxdc2	brix domain containing 2 (Bxdc2), mRNA.	0.000277437	0.0117065	-2.29554
1300002F13Rik	ERBB receptor feedback inhibitor 1 (Errfi1), mRNA.	0.000590095	0.0178964	-2.29138
5830411K18Rik	WD repeat domain 76 (Wdr76), mRNA.	1.33673e-05	0.0022334	-2.29092
Sgol1	shugoshin-like 1 (S. pombe) (Sgol1), mRNA.	0.000101476	0.00626586	-2.28778
1700001C14Rik	chemokine-like factor (Cklf), transcript variant 4, mRNA.	3.73319e-05	0.00389967	-2.25436
Zfp367	zinc finger protein 367 (Zfp367), mRNA.	1.52895e-06	0.000826195	-2.24723
Kpna2	karyopherin (importin) alpha 2 (Kpna2), mRNA.	0.000145106	0.00756346	-2.24527
Mad2l1	MAD2 (mitotic arrest deficient, homolog)-like 1 (yeast) (Mad2l1), mRNA.	0.00109069	0.0263665	-2.23717
Ccnd1	cyclin D1 (Ccnd1), mRNA.	6.3179e-05	0.0049277	-2.22379
Solt	centromere protein K (Cenpk), transcript variant 1, mRNA.	0.000115841	0.00664459	-2.21331
4632417K18Rik	RIKEN cDNA 4632417K18 gene (4632417K18Rik), mRNA.	0.0025625	0.0432059	-2.21233
Zfp131	PREDICTED: similar to putative transcription factor ZNF131, transcript variant 1 (LOC100040573), mRNA.	9.83588e-06	0.00200597	-2.18054
Birc5		8.42516e-05	0.00574353	-2.18018
Ranbp1	RAN binding protein 1 (Ranbp1), mRNA.	1.25834e-06	0.000808389	-2.1799
Cdc45l	cell division cycle 45 homolog (S. cerevisiae)-like (Cdc45l), mRNA.	4.14763e-05	0.00402195	-2.1588
Calmbp1	asp (abnormal spindle)-like, microcephaly associated (Drosophila) (Aspm), mRNA.	8.46829e-05	0.00574353	-2.1531
Stard4	StAR-related lipid transfer (START) domain containing 4 (Stard4), mRNA.	0.000112426	0.00652899	-2.12859
Kif23	kinesin family member 23 (Kif23), mRNA.	0.000583123	0.0178175	-2.12664
4930452B06Rik	RIKEN cDNA 4930452B06 gene (4930452B06Rik), mRNA.	8.82639e-07	0.000687308	-2.1264
Dbf4	DBF4 homolog (S. cerevisiae) (Dbf4), mRNA.	5.15653e-06	0.00143794	-2.11394
2810417H13Rik	RIKEN cDNA 2810417H13 gene (2810417H13Rik), mRNA.	0.00122025	0.0281985	-2.11225
Cdc2a	cell division cycle 2 homolog A (S. pombe) (Cdc2a), mRNA.	4.036e-05	0.00402195	-2.10675
Hmgb2	high mobility group box 2 (Hmgb2), mRNA.	6.06717e-05	0.00484186	-2.10367
Phlda1	pleckstrin homology-like domain, family A, member 1 (Phlda1), mRNA.	0.000224282	0.0102007	-2.0995
Cenpl	centromere protein L (Cenpl), mRNA.	2.60969e-05	0.00343904	-2.09259
Nol5	nucleolar protein 5 (Nol5), mRNA.	6.57897e-06	0.0016328	-2.08508
Kif4	kinesin family member 4 (Kif4), mRNA.	0.000474007	0.0158601	-2.07937
Upp1	uridine phosphorylase 1 (Upp1), mRNA.	0.00036077	0.0134069	-2.0611
Cdca4	cell division cycle associated 4 (Cdca4), mRNA.	9.88711e-07	0.000725911	-2.05349
Clspn	claspin homolog (Xenopus laevis) (Clspn), mRNA.	2.67844e-05	0.0034492	-2.03981
Upp1	uridine phosphorylase 1 (Upp1), mRNA.	1.47897e-05	0.00237532	-2.03882
Ssb4	splA/ryanodine receptor domain and SOCS box containing 4 (Spsb4), mRNA.	1.01239e-05	0.00203276	-2.03711
Zfp367	zinc finger protein 367 (Zfp367), mRNA.	0.000106533	0.00631417	-2.01642
Pcna	proliferating cell nuclear antigen (Pcna), mRNA.	2.04776e-05	0.00298984	-2.01058
2610318I01Rik	formin binding protein 1-like (Fnbp1l), mRNA.	0.000315636	0.0125946	-2.00832
2610528M18Rik	centromere protein Q (Cenpq), mRNA.	0.000155887	0.00787001	-2.00779
Etv5	ets variant gene 5 (Etv5), mRNA.	4.00081e-06	0.00143794	-2.00341
Zfp131	PREDICTED: similar to putative transcription factor ZNF131, transcript variant 1 (LOC100040573), mRNA.	0.000497528	0.016391	-2.00281
4930471O16Rik	integrin beta 3 binding protein (beta3-endonexin) (Itgb3bp), mRNA.	0.000572704	0.0176743	-2.00093
Ccne2	cyclin E2 (Ccne2), transcript variant 1, mRNA.	0.00173529	0.0344604	-1.99894
Kif11	kinesin family member 11 (Kif11), mRNA.	7.25354e-06	0.001742	-1.99268
Wdhd1	WD repeat and HMG-box DNA binding protein 1 (Wdhd1), mRNA.	0.000978535	0.0243421	-1.98886
Cenph	centromere protein H (Cenph), mRNA.	3.44752e-05	0.00374129	-1.9874
Thyn1	thymocyte nuclear protein 1 (Thyn1), mRNA.	5.57157e-05	0.00466361	-1.9853
Clspn	claspin homolog (Xenopus laevis) (Clspn), mRNA.	0.000279404	0.0117318	-1.98327
Mns1	meiosis-specific nuclear structural protein 1 (Mns1), mRNA.	0.000151881	0.00776711	-1.98099
Stag2	stromal antigen 2 (Stag2), transcript variant 2, mRNA.	0.0004831	0.0161014	-1.97588
Tceb1	transcription elongation factor B (SIII), polypeptide 1 (Tceb1), mRNA.	0.00179372	0.0349808	-1.97045
Cdca2	cell division cycle associated 2 (Cdca2), mRNA.	0.000185127	0.00880965	-1.96287
Matr3	matrin 3 (Matr3), mRNA.	9.29066e-05	0.00599855	-1.96036
Popdc3	popeye domain containing 3 (Popdc3), mRNA.	8.81735e-06	0.00192017	-1.9563
Incenp	inner centromere protein (Incenp), mRNA.	9.61635e-05	0.0061318	-1.95199
Fen1	flap structure specific endonuclease 1 (Fen1), mRNA.	1.30863e-05	0.00221505	-1.9507
Hat1	histone aminotransferase 1 (Hat1), mRNA.	6.98062e-05	0.00526044	-1.94719
Apitd1	apoptosis-inducing, TAF9-like domain 1 (Apitd1), mRNA.	2.50292e-05	0.00333621	-1.94635
Ncaph	non-SMC condensin I complex, subunit H (Ncaph), mRNA.	0.000182754	0.00877801	-1.93902
Mycbp	c-myc binding protein (Mycbp), mRNA.	0.000238395	0.0106171	-1.93832
Tgn	thyroglobulin (Tg), mRNA.	0.00139029	0.0303039	-1.93425
C79407	expressed sequence C79407 (C79407), mRNA.	0.00021465	0.00984973	-1.93368
Tyms	thymidylate synthase (Tyms), mRNA.	4.32402e-06	0.00143794	-1.9319
Blm	Bloom syndrome homolog (human) (Blm), transcript variant 1, mRNA.	7.98496e-05	0.00562163	-1.92982
Spc25	SPC25, NDC80 kinetochore complex component, homolog (S. cerevisiae) (Spc25), mRNA.	0.00221899	0.039837	-1.92925
Psip1	PC4 and SFRS1 interacting protein 1 (Psip1), mRNA.	5.7603e-07	0.000569317	-1.9229
Cdca8	cell division cycle associated 8 (Cdca8), mRNA.	0.000143134	0.0075217	-1.92024
2600001J17Rik	coiled-coil domain containing 99 (Ccdc99), mRNA.	0.00232688	0.041039	-1.91932
Eif1a	eukaryotic translation initiation factor 1A (Eif1a), mRNA.	9.23287e-05	0.00598848	-1.90219
Ifit2	interferon-induced protein with tetratricopeptide repeats 2 (Ifit2), mRNA.	0.000452335	0.0154365	-1.90041
Jam2	junction adhesion molecule 2 (Jam2), mRNA.	3.94106e-07	0.000468658	-1.89965
Mybl2	myeloblastosis oncogene-like 2 (Mybl2), mRNA.	0.00133577	0.0296162	-1.89602
Map3k14	mitogen-activated protein kinase kinase kinase 14 (Map3k14), mRNA.	1.64943e-05	0.00255047	-1.89575
Bex2	PREDICTED: brain expressed X-linked 2 (Bex2), mRNA.	7.80612e-05	0.00557825	-1.89388
Usp1	ubiquitin specific peptdiase 1 (Usp1), mRNA.	0.00122674	0.0282723	-1.89368
6330503K22Rik	RIKEN cDNA 6330503K22 gene (6330503K22Rik), mRNA.	0.00168882	0.0340608	-1.89048
BC031781	cDNA sequence BC031781 (BC031781), mRNA.	0.000238169	0.0106171	-1.89027
Etf1	eukaryotic translation termination factor 1 (Etf1), mRNA.	8.74195e-05	0.00586532	-1.88918
Ncapd2	non-SMC condensin I complex, subunit D2 (Ncapd2), mRNA.	0.00218786	0.0395091	-1.88913
Usp1	ubiquitin specific peptdiase 1 (Usp1), mRNA.	0.000137004	0.00730412	-1.87411
Skp2	S-phase kinase-associated protein 2 (p45) (Skp2), transcript variant 2, mRNA.	0.00290818	0.046446	-1.87274
2610016F04Rik	polybromo 1 (Pbrm1), mRNA.	2.76669e-05	0.00348308	-1.86969
Rnaset2	ribonuclease T2B (Rnaset2b), mRNA.	0.00163299	0.0333568	-1.86853
D6Ertd365e	zinc and ring finger 2 (Znrf2), mRNA.	0.000169248	0.00833173	-1.86761
E2f1	E2F transcription factor 1 (E2f1), mRNA.	0.000110087	0.00644398	-1.85958
Rrm2	ribonucleotide reductase M2 (Rrm2), mRNA.	3.7922e-05	0.00392936	-1.85894
LOC237877		4.63722e-05	0.00427106	-1.85856
Icsbp1	interferon regulatory factor 8 (Irf8), mRNA.	0.000144475	0.00754587	-1.85793
Ccne1	cyclin E1 (Ccne1), mRNA.	4.1446e-05	0.00402195	-1.85715
Ccnd1	cyclin D1 (Ccnd1), mRNA.	0.000335803	0.0129895	-1.85258
Uchl3	ubiquitin carboxyl-terminal esterase L3 (ubiquitin thiolesterase) (Uchl3), mRNA.	8.03505e-05	0.00564144	-1.85224
2610510J17Rik	RIKEN cDNA 2610510J17 gene (2610510J17Rik), mRNA.	0.000175326	0.00854908	-1.85062
Ctcf	CCCTC-binding factor (Ctcf), mRNA.	5.08013e-05	0.00452257	-1.8501
Chaf1b	chromatin assembly factor 1, subunit B (p60) (Chaf1b), mRNA.	2.71136e-05	0.0034492	-1.84279
Anp32e	acidic (leucine-rich) nuclear phosphoprotein 32 family, member E (Anp32e), mRNA.	0.00096536	0.0242255	-1.84094
Vcam1	vascular cell adhesion molecule 1 (Vcam1), mRNA.	9.34636e-06	0.00195416	-1.84045
Upp1	uridine phosphorylase 1 (Upp1), mRNA.	0.000701098	0.0199073	-1.8383
Sdpr	serum deprivation response (Sdpr), mRNA.	8.50995e-06	0.00188517	-1.83522
1810014F10Rik	nuclear autoantigenic sperm protein (histone-binding) (Nasp), transcript variant 2, mRNA.	1.20353e-05	0.00214874	-1.83417
2700084L22Rik	ubiquitin-conjugating enzyme E2T (putative) (Ube2t), mRNA.	1.694e-05	0.00259112	-1.83326
Emid2	EMI domain containing 2 (Emid2), mRNA.	2.21654e-05	0.00309557	-1.82575
Cdc7	cell division cycle 7 (S. cerevisiae) (Cdc7), mRNA.	7.89619e-05	0.00558977	-1.82396
Stmn1		0.000140251	0.00741572	-1.82162
Tmpo	thymopoietin (Tmpo), transcript variant 6, mRNA.	0.000595267	0.0179537	-1.82016
1810043J12Rik	TSC22 domain family, member 2 (Tsc22d2), mRNA.	0.0013799	0.0302662	-1.8136
Ndufa4	NADH dehydrogenase (ubiquinone) 1 alpha subcomplex, 4 (Ndufa4), mRNA.	4.75556e-06	0.00143794	-1.80161
Gpr23	G protein-coupled receptor 23 (Gpr23), mRNA.	0.00139037	0.0303039	-1.80131
Sertad1	SERTA domain containing 1 (Sertad1), mRNA.	4.62434e-06	0.00143794	-1.79988
4921537D05Rik	coiled-coil domain containing 41 (Ccdc41), mRNA.	0.000657843	0.019084	-1.79653
5730466H23Rik	Ewing's tumor-associated antigen 1 (Etaa1), mRNA.	0.00182248	0.035133	-1.78977
Kcnk5	potassium channel, subfamily K, member 5 (Kcnk5), mRNA.	0.000132612	0.00713455	-1.784
Ccnl1	cyclin L1 (Ccnl1), mRNA.	4.10372e-05	0.00402195	-1.78255
Dlg7	discs, large (Drosophila) homolog-associated protein 5 (Dlgap5), mRNA.	0.000509639	0.0166596	-1.78043
Lin54	lin-54 homolog (C. elegans) (Lin54), mRNA.	0.000359079	0.0133728	-1.78007
Pknox1	Pbx/knotted 1 homeobox (Pknox1), mRNA.	2.09841e-05	0.00299571	-1.77926
Josd3	TATA box binding protein (Tbp)-associated factor, RNA polymerase I, D (Taf1d), transcript variant 2, mRNA.	0.000613202	0.0182378	-1.77867
Timeless	timeless homolog (Drosophila) (Timeless), transcript variant 2, mRNA.	1.35871e-05	0.0022334	-1.77214
Etv1		0.000811455	0.0218483	-1.77068
Hspca	heat shock protein 90, alpha (cytosolic), class A member 1 (Hsp90aa1), mRNA.	8.42075e-06	0.00188164	-1.76802
Fignl1	fidgetin-like 1 (Fignl1), mRNA.	0.000944782	0.0239068	-1.76333
Tyms-ps	thymidylate synthase, pseudogene (Tyms-ps), non-coding RNA.	0.000171483	0.00840954	-1.76136
Lsm5	LSM5 homolog, U6 small nuclear RNA associated (S. cerevisiae) (Lsm5), mRNA.	7.49761e-05	0.00544255	-1.76133
6330503K22Rik	RIKEN cDNA 6330503K22 gene (6330503K22Rik), mRNA.	0.000553601	0.0173981	-1.75922
Mthfd2	methylenetetrahydrofolate dehydrogenase (NAD+ dependent), methenyltetrahydrofolate cyclohydrolase (Mthfd2), mRNA.	0.000563332	0.0175466	-1.75906
Cops2	COP9 (constitutive photomorphogenic) homolog, subunit 2 (Arabidopsis thaliana) (Cops2), mRNA.	0.0011977	0.027954	-1.75868
Vil2	PREDICTED: hypothetical protein LOC100044177 (LOC100044177), mRNA.	1.24489e-06	0.000808389	-1.75836
Spc25	SPC25, NDC80 kinetochore complex component, homolog (S. cerevisiae) (Spc25), mRNA.	0.00128979	0.0290225	-1.75627
Cdca5	cell division cycle associated 5 (Cdca5), mRNA.	0.000822916	0.0220273	-1.75565
Fgf22	fibroblast growth factor 22 (Fgf22), mRNA.	0.000187428	0.00889879	-1.75532
Pcf11	cleavage and polyadenylation factor subunit homolog (S. cerevisiae) (Pcf11), mRNA.	1.07434e-06	0.000766873	-1.75358
Uhrf1	ubiquitin-like, containing PHD and RING finger domains, 1 (Uhrf1), mRNA.	0.000786392	0.0215394	-1.75186
Shcbp1	Shc SH2-domain binding protein 1 (Shcbp1), mRNA.	5.2715e-05	0.00459192	-1.75175
8430423A01Rik	nuclear casein kinase and cyclin-dependent kinase substrate 1 (Nucks1), mRNA.	0.000307742	0.0123561	-1.7456
Rab38	Rab38, member of RAS oncogene family (Rab38), mRNA.	8.38409e-06	0.00188164	-1.74557
C130099A20Rik	acid phosphatase-like 2 (Acpl2), mRNA.	0.00179966	0.034989	-1.74461
Kntc1	kinetochore associated 1 (Kntc1), mRNA.	0.00241054	0.0418844	-1.74445
Birc5		0.00059524	0.0179537	-1.73849
Tipin	timeless interacting protein (Tipin), mRNA.	6.50877e-05	0.0050227	-1.73847
Blm	Bloom syndrome homolog (human) (Blm), transcript variant 2, mRNA.	0.00308446	0.0482708	-1.7382
2410042D21Rik	RIKEN cDNA 2410042D21 gene (2410042D21Rik), mRNA.	1.20617e-05	0.00214874	-1.73686
Ccar1		8.20666e-05	0.00573062	-1.73644
Uck2	uridine-cytidine kinase 2 (Uck2), mRNA.	0.000283025	0.0118258	-1.73396
Smc5l1		0.000117388	0.00671832	-1.73338
6530413N01Rik	regulator of G-protein signaling 8 (Rgs8), mRNA.	0.00181831	0.035133	-1.73298
Trim59	tripartite motif-containing 59 (Trim59), mRNA.	1.6321e-07	0.000322615	-1.73144
Zfml	zinc finger, matrin-like (Zfml), mRNA.	0.000608125	0.0181946	-1.73043
BC016226	L-2-hydroxyglutarate dehydrogenase (L2hgdh), nuclear gene encoding mitochondrial protein, mRNA.	0.000639338	0.0187663	-1.72955
Sfpq	PREDICTED: similar to PTB-associated splicing factor (LOC100045887), mRNA.	0.00105992	0.025695	-1.72869
Rbm12	RNA binding motif protein 12 (Rbm12), transcript variant 1, mRNA.	0.000177583	0.00861073	-1.72837
Oact1	membrane bound O-acyltransferase domain containing 1 (Mboat1), mRNA.	0.0011926	0.0279109	-1.72469
Smc6l1	structural maintenance of chromosomes 6 (Smc6), mRNA.	0.00123276	0.0283602	-1.72382
Twistnb	TWIST neighbor (Twistnb), mRNA.	4.03372e-06	0.00143794	-1.72253
B230114P05Rik	thrombospondin, type I, domain containing 4 (Thsd4), transcript variant 1, mRNA.	0.000333297	0.0129769	-1.71917
Tcf19	transcription factor 19 (Tcf19), mRNA.	0.000145938	0.0075761	-1.71757
Suz12	suppressor of zeste 12 homolog (Drosophila) (Suz12), mRNA.	0.00270317	0.0445278	-1.71686
Bclaf1	BCL2-associated transcription factor 1 (Bclaf1), transcript variant 3, mRNA.	0.001385	0.0302887	-1.71641
Scn3b	sodium channel, voltage-gated, type III, beta (Scn3b), transcript variant 2, mRNA.	0.00192188	0.0362603	-1.71615
Narg1	NMDA receptor-regulated gene 1 (Narg1), mRNA.	0.000361038	0.0134069	-1.71473
Fbxo30		0.000406838	0.0143803	-1.71467
Cdca3	cell division cycle associated 3 (Cdca3), mRNA.	0.000307403	0.0123561	-1.71381
Ddx48	eukaryotic translation initiation factor 4A, isoform 3 (Eif4a3), mRNA.	0.000215656	0.00986071	-1.71211
Dhx36	DEAH (Asp-Glu-Ala-His) box polypeptide 36 (Dhx36), mRNA.	0.00218737	0.0395091	-1.71044
Hnrpm	heterogeneous nuclear ribonucleoprotein M (Hnrpm), mRNA.	0.00115022	0.027292	-1.71042
Dek	DEK oncogene (DNA binding) (Dek), mRNA.	1.15779e-05	0.00212736	-1.709
Sec63	SEC63-like (S. cerevisiae) (Sec63), mRNA.	2.64885e-05	0.0034492	-1.7087
Tpx2	TPX2, microtubule-associated protein homolog (Xenopus laevis) (Tpx2), mRNA.	0.00161357	0.0330917	-1.7046
Siah2	seven in absentia 2 (Siah2), mRNA.	5.31938e-05	0.00460243	-1.70304
C77032	guanine nucleotide binding protein-like 3 (nucleolar) (Gnl3), transcript variant 1, mRNA.	1.52712e-06	0.000826195	-1.70281
Eif5	eukaryotic translation initiation factor 5 (Eif5), transcript variant 1, mRNA.	0.00280045	0.0453961	-1.69992
Kif22	kinesin family member 22 (Kif22), mRNA.	0.000878696	0.0229237	-1.69705
Cdc20	cell division cycle 20 homolog (S. cerevisiae) (Cdc20), mRNA.	0.000573621	0.0176743	-1.69656
Pknox1	Pbx/knotted 1 homeobox (Pknox1), mRNA.	7.38578e-05	0.00542264	-1.69639
Ctsc	cathepsin C (Ctsc), mRNA.	0.00120596	0.0280958	-1.69611
Cenpa	centromere protein A (Cenpa), mRNA.	0.000101924	0.00626586	-1.69219
Nap1l1	nucleosome assembly protein 1-like 1 (Nap1l1), mRNA.	0.00139748	0.0303303	-1.69085
Cbfb	core binding factor beta (Cbfb), mRNA.	9.66515e-05	0.00613248	-1.68738
Cspg6	structural maintenace of chromosomes 3 (Smc3), mRNA.	4.19111e-05	0.00404884	-1.68248
Kif2c	kinesin family member 2C (Kif2c), mRNA. XM_986361	0.000528919	0.0169386	-1.67918
Skp2	S-phase kinase-associated protein 2 (p45) (Skp2), transcript variant 2, mRNA.	0.000193164	0.00910441	-1.66984
Skp2	S-phase kinase-associated protein 2 (p45) (Skp2), transcript variant 2, mRNA.	5.96348e-05	0.00478886	-1.66462
3300001P08Rik	RIKEN cDNA 3300001P08 gene (3300001P08Rik), mRNA.	0.000771997	0.0211718	-1.6646
Raet1b	retinoic acid early transcript beta (Raet1b), mRNA.	0.000423294	0.014719	-1.66459
Setd8	SET domain containing (lysine methyltransferase) 8 (Setd8), mRNA.	0.000102777	0.00627594	-1.66177
B130017I01Rik	Rho GTPase activating protein 29 (Arhgap29), mRNA.	0.000104672	0.00631036	-1.6611
Eed	embryonic ectoderm development (Eed), mRNA.	5.54063e-05	0.00465286	-1.65766
Ung	uracil DNA glycosylase (Ung), transcript variant 2, mRNA.	0.000687202	0.0196193	-1.65749
Pole	polymerase (DNA directed), epsilon (Pole), mRNA.	0.00171228	0.0341666	-1.65558
Gnl3	guanine nucleotide binding protein-like 3 (nucleolar) (Gnl3), transcript variant 2, mRNA.	0.00022632	0.010257	-1.65332
Sfrs2	splicing factor, arginine/serine-rich 2 (SC-35) (Sfrs2), mRNA.	0.000261063	0.0113472	-1.65313
2310057H16Rik	tubulin, beta 6 (Tubb6), mRNA.	2.99743e-05	0.00356597	-1.65207
Taf5	TAF5 RNA polymerase II, TATA box binding protein (TBP)-associated factor (Taf5), mRNA.	6.22448e-06	0.00156814	-1.64919
Dnmt1	DNA methyltransferase (cytosine-5) 1 (Dnmt1), mRNA.	5.4814e-05	0.00464683	-1.64791
Sybl1	synaptobrevin like 1 (Sybl1), mRNA.	0.000449876	0.015373	-1.64684
Smek1	SMEK homolog 1, suppressor of mek1 (Dictyostelium) (Smek1), mRNA.	0.000392957	0.0141228	-1.64406
Arc	activity regulated cytoskeletal-associated protein (Arc), mRNA.	5.3679e-05	0.00460585	-1.6436
Cbfb	core binding factor beta (Cbfb), mRNA.	0.00142363	0.0306134	-1.64106
Tmpo	thymopoietin (Tmpo), transcript variant 3, mRNA.	0.00179466	0.0349808	-1.63967
Clk4	CDC like kinase 4 (Clk4), mRNA.	3.50878e-05	0.00374129	-1.63689
Hspd1	heat shock protein 1 (chaperonin) (Hspd1), mRNA.	1.93106e-05	0.00286835	-1.63603
Cdc6	cell division cycle 6 homolog (S. cerevisiae) (Cdc6), transcript variant 1, mRNA.	0.000252436	0.011032	-1.63568
Maff	v-maf musculoaponeurotic fibrosarcoma oncogene family, protein F (avian) (Maff), mRNA.	0.000166096	0.00822913	-1.63517
Cacybp	calcyclin binding protein (Cacybp), mRNA.	1.92674e-05	0.00286835	-1.63284
Polr3k	polymerase (RNA) III (DNA directed) polypeptide K (Polr3k), mRNA.	0.000324928	0.0128674	-1.63173
Midn	midnolin (Midn), mRNA.	5.1412e-05	0.00453998	-1.62799
A430106J12Rik	coiled coil domain containing 88A (Ccdc88a), mRNA.	0.000804574	0.0217633	-1.62669
5430438H03Rik	X Kell blood group precursor-related family, member 5 (Xkr5), mRNA.	0.000702121	0.0199143	-1.62594
Fubp1		0.000892858	0.0231055	-1.62561
Snrpd1	small nuclear ribonucleoprotein D1 (Snrpd1), mRNA.	0.00257493	0.0432279	-1.6255
Tmpo	thymopoietin (Tmpo), transcript variant 3, mRNA.	0.000697205	0.0198187	-1.62429
Rg9mtd1	RNA (guanine-9-) methyltransferase domain containing 1 (Rg9mtd1), mRNA.	0.00134741	0.0297717	-1.62383
Diap3	diaphanous homolog 3 (Drosophila) (Diap3), mRNA.	0.00010282	0.00627594	-1.61744
Rrm1	ribonucleotide reductase M1 (Rrm1), mRNA.	0.000839711	0.0222684	-1.6129
BC018472	COBW domain containing 1 (Cbwd1), mRNA.	0.00180223	0.034989	-1.61242
Ezh2	enhancer of zeste homolog 2 (Drosophila) (Ezh2), mRNA.	0.00103839	0.0253507	-1.61183
Tuba7	tubulin, alpha 3B (Tuba3b), mRNA.	0.00240491	0.0418408	-1.61173
Cklf	chemokine-like factor (Cklf), transcript variant 4, mRNA.	0.000762389	0.020998	-1.60987
Kif4	kinesin family member 4 (Kif4), mRNA.	1.11562e-05	0.00210795	-1.60932
Zfp238	zinc finger protein 238 (Zfp238), transcript variant 2, mRNA.	0.000567734	0.0176407	-1.60526
Spcs3	signal peptidase complex subunit 3 homolog (S. cerevisiae) (Spcs3), mRNA.	1.76249e-06	0.000870975	-1.60379
Clock	circadian locomoter output cycles kaput (Clock), mRNA.	0.00211835	0.0387165	-1.60305
Atpif1	ATPase inhibitory factor 1 (Atpif1), nuclear gene encoding mitochondrial protein, mRNA.	0.000811967	0.0218483	-1.60247
C87860	NMD3 homolog (S. cerevisiae) (Nmd3), mRNA.	8.23668e-06	0.00187308	-1.60177
Ccdc111	coiled-coil domain containing 111 (Ccdc111), mRNA.	5.72862e-05	0.00468817	-1.60123
Sh3bgrl	SH3-binding domain glutamic acid-rich protein like (Sh3bgrl), mRNA.	0.00169824	0.0341026	-1.60096
Twistnb	TWIST neighbor (Twistnb), mRNA.	8.19256e-05	0.00573062	-1.5991
Fusip1	FUS interacting protein (serine-arginine rich) 1 (Fusip1), transcript variant 2, mRNA.	0.000433427	0.0149445	-1.59605
Klhl6	kelch-like 6 (Drosophila) (Klhl6), mRNA.	0.000657993	0.019084	-1.59537
Melk	maternal embryonic leucine zipper kinase (Melk), mRNA.	0.0032489	0.0494591	-1.59509
2610312B22Rik	zinc finger CCCH-type containing 15 (Zc3h15), mRNA.	0.000733564	0.020423	-1.59252
Asf1b	ASF1 anti-silencing function 1 homolog B (S. cerevisiae) (Asf1b), mRNA.	0.000105531	0.00631036	-1.59138
Csde1	cold shock domain containing E1, RNA binding (Csde1), mRNA.	0.00159718	0.0329131	-1.59106
Gja7		0.000166891	0.00824732	-1.59099
Nup62	nucleoporin 62 (Nup62), mRNA.	2.44216e-06	0.00108201	-1.59042
4930547N16Rik	RIKEN cDNA 4930547N16 gene (4930547N16Rik), mRNA.	0.00140742	0.0304688	-1.59012
Acac	PREDICTED: hypothetical protein LOC100043671 (LOC100043671), mRNA.	0.000972599	0.0243022	-1.58996
1110014D18Rik	non-SMC element 2 homolog (MMS21, S. cerevisiae) (Nsmce2), mRNA.	0.000554032	0.0173981	-1.58936
Ris2	chromatin licensing and DNA replication factor 1 (Cdt1), mRNA.	2.97486e-05	0.00355558	-1.58926
Erh	enhancer of rudimentary homolog (Drosophila) (Erh), mRNA.	0.00196859	0.0369518	-1.589
2610101N10Rik	RIKEN cDNA 2610101N10 gene (2610101N10Rik), mRNA.	0.000289643	0.0119278	-1.58896
AA407270	expressed sequence AA407270 (AA407270), mRNA.	0.000704132	0.0199161	-1.58776
Depdc1b	DEP domain containing 1B (Depdc1b), mRNA.	0.00127825	0.0289402	-1.58559
Pold3	polymerase (DNA-directed), delta 3, accessory subunit (Pold3), mRNA.	0.00013853	0.00737018	-1.58501
Dusp6	dual specificity phosphatase 6 (Dusp6), mRNA.	0.0025244	0.0427617	-1.58444
2700038I16Rik	zinc finger protein 655 (Zfp655), transcript variant 1, mRNA.	0.000721929	0.0201865	-1.58346
B3gnt5	UDP-GlcNAc:betaGal beta-1,3-N-acetylglucosaminyltransferase 5 (B3gnt5), mRNA.	9.85104e-05	0.0061742	-1.58275
Rfc4	replication factor C (activator 1) 4 (Rfc4), mRNA.	0.000966681	0.0242349	-1.58158
Smc1a	structural maintenance of chromosomes 1A (Smc1a), mRNA.	0.00145493	0.0309334	-1.58051
Hsd17b12	hydroxysteroid (17-beta) dehydrogenase 12 (Hsd17b12), mRNA.	0.00132249	0.0295001	-1.57961
Vbp1	von Hippel-Lindau binding protein 1 (Vbp1), mRNA.	0.000104862	0.00631036	-1.57908
Map3k7ip3	mitogen-activated protein kinase kinase kinase 7 interacting protein 3 (Map3k7ip3), mRNA.	3.24552e-05	0.00364192	-1.57867
Ptpn12	protein tyrosine phosphatase, non-receptor type 12 (Ptpn12), mRNA.	0.00216606	0.0392534	-1.57856
Cenpp	centromere protein P (Cenpp), mRNA.	0.00185988	0.0355342	-1.57651
BC034076	cDNA sequence BC034076 (BC034076), mRNA.	0.00131129	0.029301	-1.57523
Orc6l	origin recognition complex, subunit 6-like (S. cerevisiae) (Orc6l), mRNA.	0.00090852	0.023363	-1.57302
2610510J17Rik	RIKEN cDNA 2610510J17 gene (2610510J17Rik), mRNA.	0.000269763	0.0115343	-1.57174
Cstf2	cleavage stimulation factor, 3' pre-RNA subunit 2 (Cstf2), mRNA.	0.0001538	0.00781067	-1.57077
Helb	helicase (DNA) B (Helb), mRNA.	0.00149452	0.0314838	-1.57057
Ddx6	DEAD (Asp-Glu-Ala-Asp) box polypeptide 6 (Ddx6), mRNA.	2.46744e-05	0.00331968	-1.56938
Gltp	glycolipid transfer protein (Gltp), mRNA.	0.00222307	0.039837	-1.56849
Hnrpdl	heterogeneous nuclear ribonucleoprotein D-like (Hnrpdl), mRNA.	8.96529e-05	0.0059072	-1.56846
Ttc3	tetratricopeptide repeat domain 3 (Ttc3), mRNA.	0.00216132	0.0391951	-1.56829
Nrm	nurim (nuclear envelope membrane protein) (Nrm), mRNA.	0.000427844	0.0148171	-1.56818
Bub1b	budding uninhibited by benzimidazoles 1 homolog, beta (S. cerevisiae) (Bub1b), mRNA.	0.00128814	0.0290225	-1.56739
Phtf2	putative homeodomain transcription factor 2 (Phtf2), mRNA.	0.00259329	0.0433687	-1.56527
Apg12l	autophagy-related 12 (yeast) (Atg12), mRNA.	0.00145944	0.0309687	-1.56371
Hn1l	hematological and neurological expressed 1-like (Hn1l), mRNA.	0.00101867	0.0250298	-1.56007
D15Wsu169e	DNA segment, Chr 15, Wayne State University 169, expressed (D15Wsu169e), mRNA.	0.000163925	0.00817938	-1.55605
Psmd14	proteasome (prosome, macropain) 26S subunit, non-ATPase, 14 (Psmd14), mRNA.	0.00136614	0.0300562	-1.55549
Tk1	thymidine kinase 1 (Tk1), mRNA.	0.00127656	0.0289402	-1.55475
Lrrfip1	leucine rich repeat (in FLII) interacting protein 1 (Lrrfip1), mRNA.	0.000173035	0.0084534	-1.55426
3110001H15Rik	ring fnger protein 168 (Rnf168), mRNA.	6.67861e-05	0.00512299	-1.55411
Magoh	mago-nashi homolog, proliferation-associated (Drosophila) (Magoh), mRNA.	0.000152036	0.00776711	-1.55273
4932442K20Rik	CCR4-NOT transcription complex, subunit 6-like (Cnot6l), transcript variant 2, mRNA.	6.9499e-05	0.00525269	-1.5498
Rbm26	RNA binding motif protein 26 (Rbm26), mRNA.	0.00130198	0.0292446	-1.54898
Mdm2	transformed mouse 3T3 cell double minute 2 (Mdm2), mRNA.	0.00074853	0.0207289	-1.54807
Fnbp3	PRP40 pre-mRNA processing factor 40 homolog A (yeast) (Prpf40a), mRNA.	0.000392917	0.0141228	-1.54632
Odc1	ornithine decarboxylase, structural 1 (Odc1), mRNA.	0.000707115	0.0199488	-1.54471
Chrna1	cholinergic receptor, nicotinic, alpha polypeptide 1 (muscle) (Chrna1), mRNA.	0.00152224	0.031877	-1.54451
Mrpl1	mitochondrial ribosomal protein L1 (Mrpl1), nuclear gene encoding mitochondrial protein, transcript variant 1, mRNA.	0.000970669	0.0242908	-1.54305
Mtf2	metal response element binding transcription factor 2 (Mtf2), mRNA.	0.00276439	0.0450739	-1.54213
Cdv3	carnitine deficiency-associated gene expressed in ventricle 3 (Cdv3), transcript variant CDV3B, mRNA. XM_975047	0.0011833	0.0277691	-1.53834
Hus1	Hus1 homolog (S. pombe) (Hus1), mRNA.	0.000492559	0.0162899	-1.53834
Rnf19	ring finger protein 19A (Rnf19a), mRNA.	5.93857e-05	0.0047838	-1.53761
Hccs	holocytochrome c synthetase (Hccs), mRNA.	5.24836e-06	0.00143794	-1.53748
Ncl	nucleolin (Ncl), mRNA.	3.21029e-05	0.00364105	-1.53429
Ctps	cytidine 5'-triphosphate synthase (Ctps), mRNA.	0.00133813	0.0296431	-1.53336
Cyld	cylindromatosis (turban tumor syndrome) (Cyld), mRNA.	0.000865737	0.0227241	-1.53316
Znhit3	zinc finger, HIT type 3 (Znhit3), mRNA.	0.000338109	0.0130261	-1.53292
Chc1	regulator of chromosome condensation 1 (Rcc1), mRNA.	0.00188947	0.0357802	-1.5327
Pkn2	protein kinase N2 (Pkn2), mRNA.	1.63442e-05	0.00255047	-1.53178
Taf9	TAF9 RNA polymerase II, TATA box binding protein (TBP)-associated factor (Taf9), transcript variant 1, mRNA.	0.000284908	0.0118451	-1.5313
3300001P08Rik	RIKEN cDNA 3300001P08 gene (3300001P08Rik), mRNA.	0.00247841	0.0423455	-1.53128
2810028N01Rik	DIS3 mitotic control homolog (S. cerevisiae) (Dis3), mRNA.	5.42942e-05	0.00461987	-1.53042
Sfrs3	splicing factor, arginine/serine-rich 3 (SRp20) (Sfrs3), mRNA.	0.00248843	0.0423479	-1.53032
Nab2	Ngfi-A binding protein 2 (Nab2), mRNA.	0.00294989	0.0469081	-1.52901
Cpsf6	cleavage and polyadenylation specific factor 6 (Cpsf6), mRNA.	0.00102	0.0250298	-1.52889
2007-09-01	septin 7 (Sept7), mRNA.	0.00220689	0.0397133	-1.52691
Atp6v1a1	ATPase, H+ transporting, lysosomal V1 subunit A (Atp6v1a), mRNA.	0.000344023	0.01316	-1.52644
Top1	topoisomerase (DNA) I (Top1), mRNA.	0.000822706	0.0220273	-1.52628
2610528A15Rik	superkiller viralicidic activity 2-like 2 (S. cerevisiae) (Skiv2l2), mRNA.	0.00159274	0.0328867	-1.5257
Dhx15	DEAH (Asp-Glu-Ala-His) box polypeptide 15 (Dhx15), transcript variant 2, mRNA.	0.000801817	0.0217345	-1.52501
Blvra		0.000355972	0.0132957	-1.52489
1810035L17Rik	RIKEN cDNA 1810035L17 gene (1810035L17Rik), mRNA.	0.000414026	0.0145146	-1.52342
Ppm1b	protein phosphatase 1B, magnesium dependent, beta isoform (Ppm1b), mRNA. XM_925494 XM_925495 XM_925496	0.00223422	0.0400089	-1.52291
Cdc20	cell division cycle 20 homolog (S. cerevisiae) (Cdc20), mRNA.	0.000827337	0.0220312	-1.52243
Zfp281	zinc finger protein 281 (Zfp281), mRNA.	0.000365168	0.0135125	-1.5204
Rnf6	ring finger protein (C3H2C3 type) 6 (Rnf6), mRNA.	0.00311915	0.048457	-1.52011
BC030477	WSC domain containing 1 (Wscd1), mRNA.	0.000642139	0.0187939	-1.51843
Dnm1l	dynamin 1-like (Dnm1l), transcript variant 2, mRNA.	0.00261318	0.0435479	-1.51735
3000004C01Rik	RIKEN cDNA 3000004C01 gene (3000004C01Rik), mRNA.	0.000374325	0.0137219	-1.51614
Tuba1b	tubulin, alpha 1B (Tuba1b), mRNA.	0.00291819	0.0465768	-1.51521
Mtbp	Mdm2, transformed 3T3 cell double minute p53 binding protein (Mtbp), mRNA.	0.000531347	0.0169826	-1.51508
D10Ertd322e	DNA segment, Chr 10, ERATO Doi 322, expressed (D10Ertd322e), mRNA.	6.79042e-05	0.00517785	-1.51425
B130055D15Rik	non-SMC condensin II complex, subunit D3 (Ncapd3), mRNA.	0.00297164	0.0471954	-1.51362
Rassf5	Ras association (RalGDS/AF-6) domain family 5 (Rassf5), mRNA.	0.00100258	0.0247724	-1.51347
BC055324	cDNA sequence BC055324 (BC055324), mRNA.	0.0002974	0.0121483	-1.51254
Tbc1d15	TBC1 domain family, member 15 (Tbc1d15), mRNA.	0.000370515	0.0136211	-1.51033
Smad5	MAD homolog 5 (Drosophila) (Smad5), mRNA.	6.60822e-06	0.0016328	-1.50962
Kbtbd2	kelch repeat and BTB (POZ) domain containing 2 (Kbtbd2), mRNA.	0.000568411	0.0176407	-1.50927
Ppif	peptidylprolyl isomerase F (cyclophilin F) (Ppif), nuclear gene encoding mitochondrial protein, mRNA.	7.82712e-05	0.00557825	-1.50885
Rpp30	ribonuclease P/MRP 30 subunit (human) (Rpp30), mRNA.	0.00187108	0.0356157	-1.50694
Prpf3	PRP3 pre-mRNA processing factor 3 homolog (yeast) (Prpf3), mRNA.	0.00210105	0.0385097	-1.50529
Phf13	PHD finger protein 13 (Phf13), mRNA.	0.000469983	0.0158121	-1.505
Ifrd1	interferon-related developmental regulator 1 (Ifrd1), mRNA.	0.00111035	0.0267913	-1.50421
Pinx1	RIKEN cDNA 2610028A01 gene (2610028A01Rik), mRNA.	0.000940365	0.0238545	-1.50404
Rbp7	retinol binding protein 7, cellular (Rbp7), mRNA.	0.00133573	0.0296162	-1.50396
Hnrpm	heterogeneous nuclear ribonucleoprotein M (Hnrpm), mRNA.	0.00059445	0.0179537	-1.50191
Mrps22	mitochondrial ribosomal protein S22 (Mrps22), mRNA.	0.00246992	0.0423366	-1.50178
Nxt1	NTF2-related export protein 1 (Nxt1), mRNA.	0.00121198	0.0281339	-1.50158
Fbxl14	F-box and leucine-rich repeat protein 14 (Fbxl14), mRNA.	0.00121666	0.028141	-1.50137
Prim2	DNA primase, p58 subunit (Prim2), mRNA.	0.00206226	0.0380702	-1.50069
Brca2	breast cancer 2 (Brca2), transcript variant 2, mRNA.	0.000111773	0.00651298	-1.50064
Ephx1	epoxide hydrolase 1, microsomal (Ephx1), mRNA.	0.00137022	0.0301202	1.50065
B930041F14Rik	RIKEN cDNA B930041F14 gene (B930041F14Rik), mRNA.	0.00324722	0.0494591	1.50091
Aebp1	AE binding protein 1 (Aebp1), mRNA.	0.00256756	0.0432279	1.5035
Hsd3b7	hydroxy-delta-5-steroid dehydrogenase, 3 beta- and steroid delta-isomerase 7 (Hsd3b7), transcript variant 1, mRNA.	0.00160973	0.0330528	1.50351
Anxa3	annexin A3 (Anxa3), mRNA.	0.0013835	0.0302887	1.50374
Eno3	enolase 3, beta muscle (Eno3), mRNA.	0.000126677	0.0070005	1.50448
2900093B09Rik	V-set and transmembrane domain containing 2B (Vstm2b), mRNA.	3.83124e-05	0.00393806	1.50455
Stard10	START domain containing 10 (Stard10), mRNA.	0.00311599	0.048457	1.50491
Enc1	ectodermal-neural cortex 1 (Enc1), mRNA.	0.0019104	0.0360968	1.50722
Phkg2	phosphorylase kinase, gamma 2 (testis) (Phkg2), mRNA.	0.000425203	0.0147655	1.50723
D19Ertd144e	CDK2-associated protein 2 (Cdk2ap2), mRNA.	5.63749e-05	0.00468817	1.50911
3830422K02Rik	inscuteable homolog (Drosophila) (Insc), mRNA.	0.000112556	0.00652899	1.50977
Rab15	RAB15, member RAS oncogene family (Rab15), mRNA.	0.000254971	0.0111239	1.5108
Pccb	propionyl Coenzyme A carboxylase, beta polypeptide (Pccb), mRNA.	0.000177031	0.00861073	1.51188
Sema3b	sema domain, immunoglobulin domain (Ig), short basic domain, secreted, (semaphorin) 3B (Sema3b), transcript variant 1, mRNA.	0.000109396	0.00644008	1.51209
BC029214	cDNA sequence BC029214 (BC029214), mRNA.	4.43613e-05	0.00417565	1.51276
Cbfa2t1h	runt-related transcription factor 1; translocated to, 1 (cyclin D-related) (Runx1t1), mRNA.	0.00177866	0.0348372	1.51355
Ivd	isovaleryl coenzyme A dehydrogenase (Ivd), nuclear gene encoding mitochondrial protein, mRNA.	5.22736e-06	0.00143794	1.5136
Col5a2	collagen, type V, alpha 2 (Col5a2), mRNA.	0.000275561	0.0116918	1.51401
Capn1	calpain 1 (Capn1), mRNA.	0.00138851	0.0303039	1.5148
AI481750	cold shock domain containing C2, RNA binding (Csdc2), mRNA.	0.000610476	0.0181946	1.51673
Cav3	caveolin 3 (Cav3), mRNA.	0.000946149	0.0239068	1.51707
Nid1	nidogen 1 (Nid1), mRNA.	0.000301464	0.0122188	1.51714
Tex264	testis expressed gene 264 (Tex264), transcript variant 1, mRNA.	0.000767807	0.0210895	1.51749
Sdf2	stromal cell derived factor 2 (Sdf2), mRNA.	0.000286442	0.011853	1.51834
Qars	glutaminyl-tRNA synthetase (Qars), mRNA.	3.49987e-05	0.00374129	1.51898
Tmem150	transmembrane protein 150 (Tmem150), mRNA.	0.000628743	0.0185497	1.5206
Dhrs6	3-hydroxybutyrate dehydrogenase, type 2 (Bdh2), mRNA.	0.00158121	0.0327945	1.52154
Bckdha	branched chain ketoacid dehydrogenase E1, alpha polypeptide (Bckdha), mRNA.	0.00318975	0.0489705	1.52188
Zfp524	zinc finger protein 524 (Zfp524), mRNA.	0.00242112	0.042009	1.52343
Hist2h2bb	histone cluster 2, H2bb (Hist2h2bb), mRNA.	0.000551816	0.0173981	1.52375
Zfand2b	zinc finger, AN1 type domain 2B (Zfand2b), mRNA.	0.000332072	0.0129735	1.52396
ORF61	open reading frame 61 (ORF61), mRNA.	0.0010471	0.0254563	1.52415
1200015A19Rik	transformation related protein 63 regulated like (Tprgl), mRNA.	0.000277235	0.0117065	1.5247
Gaa	glucosidase, alpha, acid (Gaa), mRNA.	0.00118682	0.0278263	1.52555
Rab34	RAB34, member of RAS oncogene family (Rab34), mRNA.	0.000349497	0.0132532	1.5258
BC061259	ORAI calcium release-activated calcium modulator 3 (Orai3), mRNA.	0.000405077	0.014372	1.52601
Rab4b	RAB4B, member RAS oncogene family (Rab4b), mRNA.	0.000547147	0.017294	1.52707
Galt	galactose-1-phosphate uridyl transferase (Galt), mRNA.	0.00154777	0.0322571	1.52755
2010315L10Rik	unconventional SNARE in the ER 1 homolog (S. cerevisiae) (Use1), transcript variant 1, mRNA.	0.000437472	0.0150491	1.52872
1110001E17Rik	transmembrane protein 38A (Tmem38a), mRNA.	8.41977e-05	0.00574353	1.52966
Qpct	glutaminyl-peptide cyclotransferase (glutaminyl cyclase) (Qpct), mRNA.	0.000352663	0.0132532	1.53023
Sra1	steroid receptor RNA activator 1 (Sra1), mRNA.	9.81759e-05	0.0061742	1.53153
Itga5	integrin alpha 5 (fibronectin receptor alpha) (Itga5), mRNA.	0.00114941	0.027292	1.53172
Sepm		0.000859991	0.0225963	1.5329
Smarcd2	SWI/SNF related, matrix associated, actin dependent regulator of chromatin, subfamily d, member 2 (Smarcd2), mRNA.	0.00187102	0.0356157	1.53339
Tnnt3	troponin T3, skeletal, fast (Tnnt3), mRNA.	0.000184854	0.00880965	1.53371
Slc39a13	solute carrier family 39 (metal ion transporter), member 13 (Slc39a13), mRNA.	0.00245071	0.042261	1.53506
Smtn	smoothelin (Smtn), mRNA.	0.00271372	0.044599	1.53565
Il17d	interleukin 17D (Il17d), mRNA.	0.0009708	0.0242908	1.53755
BC025872	RCSD domain containing 1 (Rcsd1), transcript variant 1, mRNA.	0.000156333	0.00787704	1.5388
Blcap	bladder cancer associated protein homolog (human) (Blcap), mRNA.	0.000306264	0.0123355	1.53989
Scotin	scotin gene (Scotin), transcript variant 2, mRNA.	0.000266603	0.0114755	1.54348
Mustn1	musculoskeletal, embryonic nuclear protein 1 (Mustn1), mRNA.	0.00321391	0.0491009	1.54657
Thy1	thymus cell antigen 1, theta (Thy1), mRNA.	0.000341133	0.0130837	1.5467
Bicc1	bicaudal C homolog 1 (Drosophila) (Bicc1), mRNA.	4.01233e-07	0.000468658	1.54727
Ccndbp1	cyclin D-type binding-protein 1 (Ccndbp1), mRNA.	0.00167253	0.0338951	1.54886
Mxd4	Max dimerization protein 4 (Mxd4), mRNA.	0.000673677	0.0193277	1.54935
D9Ertd392e		0.000987767	0.024477	1.55317
Dapk3	death-associated protein kinase 3 (Dapk3), mRNA.	0.00210495	0.0385538	1.55611
Ifitm2	interferon induced transmembrane protein 2 (Ifitm2), mRNA.	7.3101e-05	0.00541294	1.55749
Mtvr2		0.000601128	0.0181092	1.55912
Egfr	epidermal growth factor receptor (Egfr), transcript variant 2, mRNA.	0.000422086	0.0147162	1.56028
Vldlr	very low density lipoprotein receptor (Vldlr), mRNA.	0.00168237	0.0339619	1.56076
Yipf3	Yip1 domain family, member 3 (Yipf3), mRNA.	0.000301143	0.0122188	1.56404
BC056929	doublecortin-like kinase 3 (Dclk3), mRNA.	0.000589937	0.0178964	1.56723
1500005A01Rik	family with sequence similarity 158, member A (Fam158a), mRNA.	0.000954685	0.0240045	1.5677
Vkorc1	vitamin K epoxide reductase complex, subunit 1 (Vkorc1), mRNA.	2.63351e-05	0.0034492	1.56938
Cdc42ep4	CDC42 effector protein (Rho GTPase binding) 4 (Cdc42ep4), mRNA.	0.00012814	0.00704033	1.57105
Lamp2	lysosomal-associated membrane protein 2 (Lamp2), transcript variant 1, mRNA.	0.0023703	0.041435	1.57167
Tmed3	transmembrane emp24 domain containing 3 (Tmed3), mRNA.	5.10921e-05	0.00452729	1.57197
Smox	spermine oxidase (Smox), mRNA.	0.00099791	0.0246808	1.57323
BC036718	nudix (nucleoside diphosphate linked moiety X)-type motif 18 (Nudt18), mRNA.	0.000123602	0.00687488	1.57856
Dhrs7	dehydrogenase/reductase (SDR family) member 7 (Dhrs7), mRNA.	0.00082839	0.0220364	1.57913
Col24a1	collagen, type XXIV, alpha 1 (Col24a1), mRNA. XM_916101	0.00144875	0.0308955	1.57936
Lypla3	phospholipase A2, group XV (Pla2g15), mRNA.	0.000638896	0.0187663	1.58207
Ecm1	extracellular matrix protein 1 (Ecm1), mRNA.	0.000249924	0.0109409	1.584
Ctns	cystinosis, nephropathic (Ctns), mRNA.	0.00123682	0.0283773	1.58636
Sparcl1	SPARC-like 1 (mast9, hevin) (Sparcl1), mRNA.	0.000654086	0.0190136	1.58682
Gabarap	gamma-aminobutyric acid receptor associated protein (Gabarap), mRNA.	0.00237936	0.0415652	1.58807
Ltbp3	latent transforming growth factor beta binding protein 3 (Ltbp3), mRNA.	0.000867086	0.0227362	1.59059
Sort1	sortilin 1 (Sort1), mRNA.	0.00097616	0.0243325	1.59118
Ldb2	LIM domain binding 2 (Ldb2), transcript variant 2, mRNA.	0.000178511	0.00863877	1.59438
Ddit4l	DNA-damage-inducible transcript 4-like (Ddit4l), mRNA.	0.00226128	0.040241	1.59645
Csrp3	cysteine and glycine-rich protein 3 (Csrp3), mRNA.	0.000275723	0.0116918	1.59684
Gm631	coiled-coil domain containing 32 (Ccdc32), mRNA.	0.000171946	0.00841618	1.59818
Gmppa	GDP-mannose pyrophosphorylase A (Gmppa), mRNA.	0.00125329	0.0286529	1.59836
Myl1	myosin, light polypeptide 1 (Myl1), mRNA.	0.000565908	0.0176055	1.59924
Ccs	copper chaperone for superoxide dismutase (Ccs), mRNA.	0.00253538	0.0428859	1.60226
Il1rl1l	transmembrane emp24 domain containing 1 (Tmed1), mRNA.	0.00202673	0.0375765	1.60362
Adam15	a disintegrin and metallopeptidase domain 15 (metargidin) (Adam15), transcript variant 2, mRNA.	0.000135149	0.0072202	1.60427
AI429612	integrin alpha FG-GAP repeat containing 3 (Itfg3), mRNA.	2.18532e-05	0.00306864	1.60496
Echdc2	enoyl Coenzyme A hydratase domain containing 2 (Echdc2), mRNA.	0.00014828	0.00766669	1.60682
Nedd9	neural precursor cell expressed, developmentally down-regulated gene 9 (Nedd9), mRNA.	0.000274347	0.0116914	1.6093
4930422J18Rik	splA/ryanodine receptor domain and SOCS box containing 1 (Spsb1), mRNA.	9.88964e-05	0.00618331	1.61156
Cxcl4	chemokine (C-X-C motif) ligand 4 (Cxcl4), mRNA.	0.00243386	0.0421164	1.61448
Plekhf1	pleckstrin homology domain containing, family F (with FYVE domain) member 1 (Plekhf1), mRNA.	0.00012115	0.00681224	1.61726
6330442E10Rik	RIKEN cDNA 6330442E10 gene (6330442E10Rik), mRNA.	0.000104181	0.00631036	1.61928
Rgs4	regulator of G-protein signaling 4 (Rgs4), mRNA.	0.00118927	0.0278584	1.62199
Olfml1	olfactomedin-like 1 (Olfml1), mRNA.	0.000196784	0.00922768	1.62505
Rin2	Ras and Rab interactor 2 (Rin2), mRNA.	0.000330092	0.0129735	1.62539
0610039P13Rik	hydrogen voltage-gated channel 1 (Hvcn1), transcript variant 1, mRNA.	0.000426487	0.0147901	1.6257
Map3k12	mitogen activated protein kinase kinase kinase 12 (Map3k12), mRNA.	0.000835439	0.022178	1.62663
Rcn3	reticulocalbin 3, EF-hand calcium binding domain (Rcn3), mRNA.	0.00165293	0.0336559	1.62946
1810049H13Rik	RIKEN cDNA 1810049H13 gene (1810049H13Rik), mRNA.	0.000352772	0.0132532	1.63022
Zfp99	zinc finger with KRAB and SCAN domains 14 (Zkscan14), mRNA.	0.000150121	0.0077308	1.63111
Ephb2		0.000351837	0.0132532	1.63398
Crabp1	cellular retinoic acid binding protein I (Crabp1), mRNA.	0.00315574	0.0487753	1.63698
Mmp14	matrix metallopeptidase 14 (membrane-inserted) (Mmp14), mRNA.	0.00084594	0.0223873	1.63848
Myoz1	myozenin 1 (Myoz1), mRNA.	1.76112e-06	0.000870975	1.63916
Maged2	melanoma antigen, family D, 2 (Maged2), mRNA.	0.00091433	0.0234161	1.6426
Pdk2	pyruvate dehydrogenase kinase, isoenzyme 2 (Pdk2), mRNA.	5.26862e-05	0.00459192	1.64281
Dscr1l1	regulator of calcineurin 2 (Rcan2), transcript variant 1, mRNA.	0.000226817	0.0102615	1.64282
Mapk8ip1	mitogen activated protein kinase 8 interacting protein 1 (Mapk8ip1), mRNA.	0.00209462	0.0384743	1.64343
Hspb8	heat shock protein 8 (Hspb8), mRNA.	0.000110806	0.00647134	1.64621
Pdgfrl	platelet-derived growth factor receptor-like (Pdgfrl), mRNA.	9.65055e-05	0.00613248	1.647
Tnnc1	troponin C, cardiac/slow skeletal (Tnnc1), mRNA.	0.000170076	0.00835648	1.65197
Agpt2	angiopoietin 2 (Angpt2), mRNA.	0.00139315	0.0303303	1.65485
Wisp2	WNT1 inducible signaling pathway protein 2 (Wisp2), mRNA.	0.00138039	0.0302662	1.65598
Aqp1	aquaporin 1 (Aqp1), mRNA.	0.000792346	0.0216146	1.65633
1810009M01Rik	transmembrane protein 176B (Tmem176b), mRNA.	0.000249037	0.0109237	1.65708
Lmo2	LIM domain only 2 (Lmo2), mRNA.	0.00151961	0.031851	1.6572
Cotl1	coactosin-like 1 (Dictyostelium) (Cotl1), mRNA.	0.00085261	0.0224944	1.65816
2810405K02Rik	RIKEN cDNA 2810405K02 gene (2810405K02Rik), mRNA.	0.0012863	0.0290203	1.65864
9530046H09Rik	membrane-associated ring finger (C3HC4) 2 (March2), mRNA.	0.00214811	0.0390935	1.65909
Tst	thiosulfate sulfurtransferase, mitochondrial (Tst), nuclear gene encoding mitochondrial protein, mRNA.	0.000274879	0.0116918	1.65951
Pnpla2	patatin-like phospholipase domain containing 2 (Pnpla2), mRNA.	0.00315057	0.0487419	1.66202
Sfrp1		0.000472844	0.0158418	1.66232
Sparc	secreted acidic cysteine rich glycoprotein (Sparc), mRNA.	0.000391544	0.0141228	1.66475
Rusc2	RUN and SH3 domain containing 2 (Rusc2), transcript variant 1, mRNA.	5.76113e-05	0.0046998	1.66575
Map1lc3a	microtubule-associated protein 1 light chain 3 alpha (Map1lc3a), mRNA.	0.000607665	0.0181946	1.66598
Agtr1a	angiotensin II receptor, type 1a (Agtr1a), mRNA.	0.00301504	0.0476198	1.6665
Ptn	pleiotrophin (Ptn), mRNA.	0.00139717	0.0303303	1.66714
MGC41689		0.00162603	0.0332675	1.66933
Ube1l	ubiquitin-activating enzyme E1-like (Ube1l), mRNA.	0.000588473	0.0178964	1.67147
Vldlr	very low density lipoprotein receptor (Vldlr), mRNA.	7.64594e-06	0.00178616	1.67218
Man2b1	mannosidase 2, alpha B1 (Man2b1), mRNA.	0.000814888	0.0219039	1.67318
Actn2	actinin alpha 2 (Actn2), mRNA.	0.000470111	0.0158121	1.67319
Lrp10	low-density lipoprotein receptor-related protein 10 (Lrp10), mRNA.	0.00155612	0.0323786	1.67466
Ltbp3	latent transforming growth factor beta binding protein 3 (Ltbp3), mRNA.	0.000120903	0.00681224	1.67626
Rrad		0.0013781	0.0302662	1.67656
Fap	fibroblast activation protein (Fap), mRNA.	0.000222562	0.0101404	1.677
Wdr45	WD repeat domain 45 (Wdr45), mRNA.	0.000212253	0.00977466	1.68235
BC051244	threonine synthase-like 2 (bacterial) (Thnsl2), transcript variant 1, mRNA.	0.000636814	0.0187448	1.68332
1190007F08Rik	RIKEN cDNA 1190007F08 gene (1190007F08Rik), mRNA. XM_921339 XM_921348 XM_921353	0.000877511	0.0229161	1.68732
Leprel2	leprecan-like 2 (Leprel2), mRNA.	0.00186169	0.0355366	1.6877
Scx	scleraxis (Scx), mRNA.	0.00042264	0.0147162	1.69085
Nrp	neuropilin 1 (Nrp1), mRNA.	0.00128062	0.0289429	1.6913
Angptl1	angiopoietin-like 1 (Angptl1), mRNA.	3.76316e-05	0.00391505	1.69574
Tsrc1	ADAMTS-like 4 (Adamtsl4), mRNA.	2.94617e-05	0.00355558	1.69624
Rras	Harvey rat sarcoma oncogene, subgroup R (Rras), mRNA.	1.26725e-05	0.0022003	1.69746
Lxn	latexin (Lxn), mRNA.	0.000308521	0.0123561	1.7009
Bhlhb2	basic helix-loop-helix domain containing, class B2 (Bhlhb2), mRNA.	4.29187e-05	0.00409316	1.70101
Vamp8	vesicle-associated membrane protein 8 (Vamp8), mRNA.	0.00142112	0.0306107	1.70538
Htra3		0.00179235	0.0349808	1.70785
Col6a1	procollagen, type VI, alpha 1 (Col6a1), mRNA.	7.13319e-06	0.00172926	1.70915
Lrpap1	low density lipoprotein receptor-related protein associated protein 1 (Lrpap1), mRNA.	5.24935e-05	0.00459192	1.70921
Col6a1	procollagen, type VI, alpha 1 (Col6a1), mRNA.	0.00277874	0.0452218	1.71014
Acta1	actin, alpha 1, skeletal muscle (Acta1), mRNA.	0.000493669	0.0163057	1.71187
Ppap2b	phosphatidic acid phosphatase type 2B (Ppap2b), mRNA.	0.00073039	0.0203787	1.71466
Gnb3	guanine nucleotide binding protein (G protein), beta 3 (Gnb3), mRNA.	5.4236e-07	0.000557481	1.71617
Mxra8	matrix-remodelling associated 8 (Mxra8), mRNA.	0.00053962	0.0171404	1.72285
Srpx2	sushi-repeat-containing protein, X-linked 2 (Srpx2), mRNA.	0.00044468	0.0152172	1.72571
Angptl2	angiopoietin-like 2 (Angptl2), mRNA.	0.00157387	0.032695	1.72925
4930429A22Rik	DIS3 mitotic control homolog (S. cerevisiae)-like 2 (Dis3l2), mRNA.	0.000519497	0.0168082	1.7312
Fbxo6b	F-box protein 6 (Fbxo6), mRNA.	9.97031e-05	0.00621862	1.73264
2010315L10Rik	unconventional SNARE in the ER 1 homolog (S. cerevisiae) (Use1), transcript variant 1, mRNA.	0.000463545	0.0156733	1.7343
Egfr	epidermal growth factor receptor (Egfr), transcript variant 2, mRNA.	0.00265936	0.0439752	1.73619
Cxcl14	chemokine (C-X-C motif) ligand 14 (Cxcl14), mRNA.	0.000382619	0.0139266	1.73712
Figf	c-fos induced growth factor (Figf), mRNA.	4.14656e-05	0.00402195	1.7477
Sfrp2	secreted frizzled-related protein 2 (Sfrp2), mRNA.	0.000284724	0.0118451	1.74925
E130307J07Rik	sorting nexin 33 (Snx33), mRNA.	0.000546288	0.0172881	1.7502
Mrg1	Meis homeobox 2 (Meis2), transcript variant 2, mRNA.	0.000383621	0.0139433	1.75123
Zfyve21	zinc finger, FYVE domain containing 21 (Zfyve21), mRNA.	0.0014953	0.0314838	1.75614
2310009N05Rik	PQ loop repeat containing 1 (Pqlc1), mRNA.	0.000602771	0.0181244	1.75668
Mbp	myelin basic protein (Mbp), transcript variant 7, mRNA.	0.00257402	0.0432279	1.76033
Hsd3b7	hydroxy-delta-5-steroid dehydrogenase, 3 beta- and steroid delta-isomerase 7 (Hsd3b7), transcript variant 1, mRNA.	5.84483e-05	0.00474644	1.7608
Kazald1	Kazal-type serine peptidase inhibitor domain 1 (Kazald1), mRNA.	0.000112856	0.00653164	1.76542
Cyhr1	cysteine and histidine rich 1 (Cyhr1), transcript variant 2, mRNA.	2.40157e-08	0.000102855	1.76687
Mvp	major vault protein (Mvp), mRNA.	0.000486768	0.0161608	1.76854
Dusp23	dual specificity phosphatase 23 (Dusp23), mRNA.	0.00112145	0.0269978	1.7687
Bcas3	breast carcinoma amplified sequence 3 (Bcas3), mRNA.	0.00119592	0.0279378	1.77053
Myoz2	myozenin 2 (Myoz2), mRNA.	6.92053e-05	0.00524592	1.77458
Pdlim2	PDZ and LIM domain 2 (Pdlim2), mRNA.	0.000824341	0.0220273	1.77489
9130416N05Rik	ankyrin repeat domain 39 (Ankrd39), mRNA.	1.37322e-05	0.0022334	1.77517
Eng	endoglin (Eng), mRNA.	0.000316201	0.0125975	1.77738
Hdc	histidine decarboxylase (Hdc), mRNA.	7.36678e-05	0.00542264	1.78188
Gdf10	growth differentiation factor 10 (Gdf10), mRNA.	0.00127937	0.0289402	1.78657
Ppp1r14a	protein phosphatase 1, regulatory (inhibitor) subunit 14A (Ppp1r14a), mRNA.	0.00169319	0.0340987	1.7866
AL024069	RIKEN cDNA 5033414K04 gene (5033414K04Rik), mRNA.	0.00272467	0.044653	1.78742
Gng7	guanine nucleotide binding protein (G protein), gamma 7 (Gng7), transcript variant 2, mRNA.	1.78409e-05	0.00268104	1.79535
1700029G01Rik	RIKEN cDNA 1700029G01 gene (1700029G01Rik), mRNA.	4.99801e-05	0.00450645	1.79585
Yipf3	Yip1 domain family, member 3 (Yipf3), mRNA.	6.95729e-06	0.00170268	1.79705
Spink2	serine peptidase inhibitor, Kazal type 2 (Spink2), mRNA.	0.000888473	0.0230384	1.79975
Fcgrt	Fc receptor, IgG, alpha chain transporter (Fcgrt), mRNA.	7.58367e-06	0.00178616	1.80013
Rabac1		3.47275e-05	0.00374129	1.80379
Bgn	biglycan (Bgn), mRNA.	0.00143491	0.0307577	1.80401
Oplah	5-oxoprolinase (ATP-hydrolysing) (Oplah), mRNA.	0.000400821	0.0143054	1.80653
Chst5	carbohydrate (N-acetylglucosamine 6-O) sulfotransferase 5 (Chst5), mRNA.	0.0002818	0.0117938	1.80686
Ptx3	pentraxin related gene (Ptx3), mRNA.	0.000584017	0.0178236	1.80715
Itgb5	integrin beta 5 (Itgb5), mRNA.	0.0015515	0.0323086	1.80917
Anpep	alanyl (membrane) aminopeptidase (Anpep), mRNA.	0.000573299	0.0176743	1.81175
Ror2	receptor tyrosine kinase-like orphan receptor 2 (Ror2), mRNA.	4.95904e-05	0.00450292	1.81182
Pcolce	procollagen C-endopeptidase enhancer protein (Pcolce), mRNA.	2.68308e-05	0.0034492	1.81804
Rassf2	Ras association (RalGDS/AF-6) domain family member 2 (Rassf2), mRNA.	8.69095e-06	0.00190881	1.82152
Dscr1l1	regulator of calcineurin 2 (Rcan2), transcript variant 1, mRNA.	0.000798633	0.0217122	1.82199
Tnni2	troponin I, skeletal, fast 2 (Tnni2), mRNA.	0.000710197	0.0200109	1.82322
Zfp185	zinc finger protein 185 (Zfp185), mRNA.	5.17508e-05	0.00455425	1.8295
Axl	AXL receptor tyrosine kinase (Axl), mRNA.	0.000739051	0.0205535	1.83327
Cpxm1	carboxypeptidase X 1 (M14 family) (Cpxm1), mRNA.	0.00183629	0.0352336	1.83406
BC046404	cDNA sequence BC046404 (BC046404), mRNA.	1.09811e-05	0.00210497	1.83448
St6gal1	beta galactoside alpha 2,6 sialyltransferase 1 (St6gal1), mRNA.	0.00175442	0.0345996	1.84013
Asphd2	aspartate beta-hydroxylase domain containing 2 (Asphd2), mRNA.	0.000118447	0.00676387	1.84072
S100a6	S100 calcium binding protein A6 (calcyclin) (S100a6), mRNA.	0.000210086	0.00970968	1.84331
Laptm4a	lysosomal-associated protein transmembrane 4A (Laptm4a), mRNA.	3.45909e-05	0.00374129	1.84348
Ptgis	prostaglandin I2 (prostacyclin) synthase (Ptgis), mRNA.	9.34738e-05	0.00602004	1.84458
Htra3		0.000130782	0.0070888	1.84734
Sulf1	sulfatase 1 (Sulf1), mRNA.	0.00102189	0.0250329	1.84782
Col14a1	collagen, type XIV, alpha 1 (Col14a1), mRNA.	3.17066e-05	0.00362711	1.84873
Col6a2	procollagen, type VI, alpha 2 (Col6a2), mRNA.	0.000894354	0.023121	1.8546
Tnnt1	troponin T1, skeletal, slow (Tnnt1), mRNA.	0.00013926	0.00737849	1.85479
Tmed3	transmembrane emp24 domain containing 3 (Tmed3), mRNA.	0.00126197	0.028798	1.85492
Tgfbr3	transforming growth factor, beta receptor III (Tgfbr3), mRNA.	0.000105772	0.00631036	1.85523
Tgfbi	transforming growth factor, beta induced (Tgfbi), mRNA.	0.00032347	0.0128473	1.85748
Osr2	odd-skipped related 2 (Drosophila) (Osr2), mRNA.	8.30755e-05	0.00574353	1.85775
Bmf		0.000166203	0.00822913	1.86086
Cxcl12		0.00132878	0.0295634	1.86407
Ltbp1	latent transforming growth factor beta binding protein 1 (Ltbp1), transcript variant 1, mRNA.	2.86723e-05	0.00355558	1.86674
Ypel3	yippee-like 3 (Drosophila) (Ypel3), mRNA.	0.00080015	0.0217122	1.86894
Acas2	acyl-CoA synthetase short-chain family member 2 (Acss2), mRNA.	0.000336201	0.0129895	1.87412
Gstt3	glutathione S-transferase, theta 3 (Gstt3), mRNA.	2.59208e-05	0.00343343	1.8757
Nnmt	nicotinamide N-methyltransferase (Nnmt), mRNA.	0.00211275	0.038669	1.87741
Tgfbi	transforming growth factor, beta induced (Tgfbi), mRNA.	0.000109519	0.00644008	1.87877
Card10	caspase recruitment domain family, member 10 (Card10), mRNA.	6.65125e-05	0.00511728	1.87948
Vps33a	vacuolar protein sorting 33A (yeast) (Vps33a), mRNA.	6.32814e-05	0.0049277	1.88342
Smoc1	SPARC related modular calcium binding 1 (Smoc1), mRNA.	0.000438724	0.015072	1.88501
Tpbg	trophoblast glycoprotein (Tpbg), mRNA.	5.92995e-05	0.0047838	1.8865
Mxra8	matrix-remodelling associated 8 (Mxra8), mRNA.	0.000355127	0.0132866	1.89197
1500015O10Rik	RIKEN cDNA 1500015O10 gene (1500015O10Rik), mRNA.	3.78068e-06	0.00143794	1.90171
Ctsh	cathepsin H (Ctsh), mRNA.	7.4547e-05	0.00544214	1.90694
Pgam2	phosphoglycerate mutase 2 (Pgam2), mRNA.	9.20222e-06	0.00195416	1.91448
Dbp	D site albumin promoter binding protein (Dbp), mRNA.	7.45407e-05	0.00544214	1.91671
Abhd4	abhydrolase domain containing 4 (Abhd4), mRNA.	5.58108e-06	0.00144866	1.9173
Nnmt	nicotinamide N-methyltransferase (Nnmt), mRNA.	0.000385138	0.0139787	1.92514
Clec3b	C-type lectin domain family 3, member b (Clec3b), mRNA.	0.000183536	0.00878766	1.93194
Col3a1	collagen, type III, alpha 1 (Col3a1), mRNA.	7.69771e-05	0.00552536	1.93305
BC046404	cDNA sequence BC046404 (BC046404), mRNA.	5.7114e-10	4.8922e-06	1.93825
Pitx2	paired-like homeodomain transcription factor 2 (Pitx2), transcript variant 3, mRNA.	2.29479e-05	0.00317175	1.94407
Srpx2	sushi-repeat-containing protein, X-linked 2 (Srpx2), mRNA.	0.00127371	0.0289399	1.94609
Ckm	creatine kinase, muscle (Ckm), mRNA.	3.1644e-05	0.00362711	1.94882
Neu1	neuraminidase 1 (Neu1), mRNA.	3.85084e-06	0.00143794	1.94932
Atp2a1	ATPase, Ca++ transporting, cardiac muscle, fast twitch 1 (Atp2a1), mRNA.	2.92475e-05	0.00355558	1.95819
Nrap	nebulin-related anchoring protein (Nrap), transcript variant 1, mRNA.	0.000500854	0.0164584	1.96332
Fxyd5	FXYD domain-containing ion transport regulator 5 (Fxyd5), mRNA.	0.000305352	0.0123181	1.9666
Eln	elastin (Eln), mRNA.	2.96454e-05	0.00355558	1.96712
Thbs3	thrombospondin 3 (Thbs3), mRNA.	0.000388413	0.0140776	1.97349
1110012D08Rik	RIKEN cDNA 1110012D08 gene (1110012D08Rik), mRNA.	9.13743e-06	0.00195416	1.97674
Apeh	acylpeptide hydrolase (Apeh), mRNA.	8.38499e-05	0.00574353	1.98215
Asb2	ankyrin repeat and SOCS box-containing 2 (Asb2), mRNA.	4.71974e-06	0.00143794	1.9844
Igfbp7	insulin-like growth factor binding protein 7 (Igfbp7), mRNA.	1.13322e-05	0.00211726	1.98562
Il11ra1	interleukin 11 receptor, alpha chain 1 (Il11ra1), mRNA.	4.0012e-05	0.00402195	2.00256
Ccnd2	cyclin D2 (Ccnd2), mRNA.	4.60182e-06	0.00143794	2.00575
Emilin2	elastin microfibril interfacer 2 (Emilin2), mRNA.	0.000526538	0.0169131	2.00712
Itga11	integrin alpha 11 (Itga11), mRNA.	0.000161307	0.00808015	2.01092
Plod1	procollagen-lysine, 2-oxoglutarate 5-dioxygenase 1 (Plod1), mRNA.	0.000239531	0.0106308	2.0114
Adssl1	adenylosuccinate synthetase like 1 (Adssl1), mRNA.	0.000145773	0.0075761	2.01315
Hsd11b1	hydroxysteroid 11-beta dehydrogenase 1 (Hsd11b1), transcript variant 1, mRNA.	0.000190397	0.00899381	2.01648
Ebf2	early B-cell factor 2 (Ebf2), mRNA.	0.000269507	0.0115343	2.01742
Myh8	myosin, heavy polypeptide 8, skeletal muscle, perinatal (Myh8), mRNA.	2.79221e-05	0.00348308	2.01911
Pygb	brain glycogen phosphorylase (Pygb), mRNA.	0.00200676	0.0374221	2.01918
Spp1	secreted phosphoprotein 1 (Spp1), mRNA.	0.00290249	0.046384	2.01979
Nupr1	nuclear protein 1 (Nupr1), mRNA.	5.16506e-06	0.00143794	2.02053
Stk23	serine/arginine-rich protein specific kinase 3 (Srpk3), mRNA.	5.42788e-06	0.00143794	2.02118
1500004A08Rik	phosphoinositide-3-kinase interacting protein 1 (Pik3ip1), mRNA.	0.000625291	0.0184691	2.02195
Wfdc1		5.62092e-05	0.00468817	2.02699
Myl1	myosin, light polypeptide 1 (Myl1), mRNA.	0.000332705	0.0129735	2.03189
4930583H14Rik	RIKEN cDNA 4930583H14 gene (4930583H14Rik), mRNA.	0.000471824	0.0158418	2.04075
Sphk1	sphingosine kinase 1 (Sphk1), transcript variant 1, mRNA.	5.386e-05	0.00460585	2.04398
Anxa3	annexin A3 (Anxa3), mRNA.	7.97013e-05	0.00562163	2.04476
Slitl2	vasorin (Vasn), mRNA.	5.39778e-06	0.00143794	2.0493
Srpx2	sushi-repeat-containing protein, X-linked 2 (Srpx2), mRNA.	0.000405961	0.014372	2.05161
Lgals3bp	lectin, galactoside-binding, soluble, 3 binding protein (Lgals3bp), mRNA.	0.000925654	0.0235978	2.06692
Thbs3	thrombospondin 3 (Thbs3), mRNA.	3.12857e-05	0.00362711	2.08724
Dpysl3	dihydropyrimidinase-like 3 (Dpysl3), mRNA.	0.00013016	0.0070888	2.08844
Triobp	TRIO and F-actin binding protein (Triobp), transcript variant 3, mRNA.	0.000379309	0.0138453	2.09877
Srpx	sushi-repeat-containing protein (Srpx), mRNA.	9.22909e-07	0.000697529	2.1142
Loxl1	lysyl oxidase-like 1 (Loxl1), mRNA.	1.45368e-06	0.000826195	2.11851
Ldb2		4.23996e-05	0.00406546	2.12077
Usp2	ubiquitin specific peptidase 2 (Usp2), transcript variant 2, mRNA.	0.000130137	0.0070888	2.12517
Fmo1	flavin containing monooxygenase 1 (Fmo1), mRNA.	2.96134e-07	0.000380488	2.1282
Itgbl1	integrin, beta-like 1 (Itgbl1), mRNA.	2.77945e-05	0.00348308	2.13585
Abhd14b	abhydrolase domain containing 14b (Abhd14b), mRNA.	0.000398664	0.0142816	2.13855
Myl4	myosin, light polypeptide 4 (Myl4), mRNA.	9.10908e-05	0.00597012	2.14128
Rarres2	retinoic acid receptor responder (tazarotene induced) 2 (Rarres2), mRNA.	0.000372557	0.0136766	2.14308
Ngfr	nerve growth factor receptor (TNFR superfamily, member 16) (Ngfr), mRNA.	1.99143e-05	0.00294102	2.14309
BC054438	transmembrane protein 204 (Tmem204), mRNA.	4.28424e-06	0.00143794	2.14478
Igfbp4		3.04053e-05	0.00360035	2.1456
Inhbb	PREDICTED: similar to Inhbb protein (LOC100046802), mRNA.	0.000410552	0.0144607	2.15236
Mfap2	microfibrillar-associated protein 2 (Mfap2), mRNA.	3.6229e-06	0.00143794	2.16485
Col16a1	collagen, type XVI, alpha 1 (Col16a1), mRNA.	0.000119511	0.00680948	2.16945
Crim2	cysteine rich BMP regulator 2 (chordin like) (Crim2), mRNA.	0.00046737	0.0157612	2.17127
Cdo1	cysteine dioxygenase 1, cytosolic (Cdo1), mRNA.	0.000272858	0.0116472	2.1815
Aqp1	aquaporin 1 (Aqp1), mRNA.	1.70125e-06	0.000870975	2.18735
Ramp1	receptor (calcitonin) activity modifying protein 1 (Ramp1), mRNA.	5.11163e-06	0.00143794	2.19223
1810054O13Rik	transmembrane protein 86A (Tmem86a), mRNA.	8.4603e-05	0.00574353	2.19344
Cd248	CD248 antigen, endosialin (Cd248), mRNA.	0.000131497	0.00709891	2.19671
Ednra	endothelin receptor type A (Ednra), mRNA.	0.00130805	0.029301	2.19969
C2	complement component 2 (within H-2S) (C2), mRNA.	4.61028e-05	0.00427106	2.20918
Etv4	ets variant gene 4 (E1A enhancer binding protein, E1AF) (Etv4), mRNA.	4.3497e-06	0.00143794	2.20928
Rasl11b	RAS-like, family 11, member B (Rasl11b), mRNA.	1.54327e-06	0.000826195	2.21164
9430023B20Rik	mohawk (Mkx), mRNA.	2.17834e-05	0.00306864	2.21503
Akap12	A kinase (PRKA) anchor protein (gravin) 12 (Akap12), mRNA.	1.41223e-05	0.00228239	2.21634
Mylk	myosin, light polypeptide kinase (Mylk), mRNA.	0.00177691	0.0348293	2.22117
Thbd	thrombomodulin (Thbd), mRNA.	0.000242162	0.0107105	2.24035
Vtn	vitronectin (Vtn), mRNA.	4.08505e-05	0.00402195	2.2491
Ttyh1	tweety homolog 1 (Drosophila) (Ttyh1), transcript variant 1, mRNA.	0.000121015	0.00681224	2.25363
Lum	lumican (Lum), mRNA.	0.000511296	0.0166596	2.26152
Dcn	decorin (Dcn), mRNA.	8.445e-05	0.00574353	2.26494
Tnnc2	troponin C2, fast (Tnnc2), mRNA.	3.56272e-06	0.00143794	2.27822
Mylpf	myosin light chain, phosphorylatable, fast skeletal muscle (Mylpf), mRNA.	7.89112e-05	0.00558977	2.28563
Klf2	Kruppel-like factor 2 (lung) (Klf2), mRNA.	5.08629e-05	0.00452257	2.28574
Ntrk2	neurotrophic tyrosine kinase, receptor, type 2 (Ntrk2), transcript variant 1, mRNA.	9.42927e-05	0.00604249	2.28669
Bmper	BMP-binding endothelial regulator (Bmper), mRNA.	1.04575e-05	0.0020358	2.28733
2610001E17Rik	coiled-coil domain containing 80 (Ccdc80), mRNA.	1.31693e-06	0.000818301	2.2921
Mmp23	matrix metallopeptidase 23 (Mmp23), mRNA.	3.81324e-06	0.00143794	2.29387
Col1a2	collagen, type I, alpha 2 (Col1a2), mRNA.	1.36736e-06	0.000818301	2.29449
Nrp	neuropilin 1 (Nrp1), mRNA.	0.000100293	0.00623705	2.30668
Actn3	actinin alpha 3 (Actn3), mRNA.	1.13703e-05	0.00211726	2.30779
Tmod2	tropomodulin 2 (Tmod2), transcript variant 1, mRNA. XM_001004496 XM_001004498	0.00316388	0.0488008	2.32331
Gja1	gap junction membrane channel protein alpha 1 (Gja1), mRNA.	1.36984e-05	0.0022334	2.32403
Hic1	hypermethylated in cancer 1 (Hic1), transcript variant 1, mRNA.	0.000164754	0.00820483	2.32425
Srpx	sushi-repeat-containing protein (Srpx), mRNA.	1.85192e-06	0.000897901	2.32822
Atp1a2	ATPase, Na+/K+ transporting, alpha 2 polypeptide (Atp1a2), mRNA.	0.000100727	0.00623705	2.33423
Mfng	MFNG O-fucosylpeptide 3-beta-N-acetylglucosaminyltransferase (Mfng), mRNA.	3.28189e-06	0.00138254	2.33692
2610027C15Rik	RIKEN cDNA 2610027C15 gene (2610027C15Rik), mRNA.	1.6575e-05	0.00255047	2.34618
Serping1	serine (or cysteine) peptidase inhibitor, clade G, member 1 (Serping1), mRNA.	2.34206e-06	0.00105586	2.34704
E430002G05Rik	RIKEN cDNA E430002G05 gene (E430002G05Rik), mRNA.	4.03135e-05	0.00402195	2.35229
Cxcl14	chemokine (C-X-C motif) ligand 14 (Cxcl14), mRNA.	5.78677e-06	0.00148703	2.35711
Kirrel3	kin of IRRE like 3 (Drosophila) (Kirrel3), mRNA. XM_922973 XM_922987 XM_922995 XM_923006 XM_923014	3.49809e-05	0.00374129	2.36566
Adamts2	a disintegrin-like and metallopeptidase (reprolysin type) with thrombospondin type 1 motif, 2 (Adamts2), mRNA.	1.64058e-05	0.00255047	2.36878
Mrgprf	MAS-related GPR, member F (Mrgprf), mRNA.	3.36571e-05	0.00372796	2.36883
Col12a1	collagen, type XII, alpha 1 (Col12a1), mRNA.	5.0364e-07	0.000539251	2.38401
Actn3	actinin alpha 3 (Actn3), mRNA.	4.30071e-05	0.00409316	2.39212
Tmem119	transmembrane protein 119 (Tmem119), mRNA.	1.12734e-06	0.000768322	2.39621
Mip	major intrinsic protein of eye lens fiber (Mip), mRNA.	5.55163e-08	0.000178325	2.41644
Prss35	protease, serine, 35 (Prss35), mRNA.	8.57402e-05	0.00578285	2.41845
Gpx3	glutathione peroxidase 3 (Gpx3), transcript variant 2, mRNA.	0.000787637	0.0215394	2.42875
Entpd2	ectonucleoside triphosphate diphosphohydrolase 2 (Entpd2), mRNA.	0.000233954	0.010492	2.44849
Lgals3	lectin, galactose binding, soluble 3 (Lgals3), mRNA.	3.9708e-05	0.00402195	2.44862
C1qtnf2	C1q and tumor necrosis factor related protein 2 (C1qtnf2), mRNA.	7.27101e-05	0.00541294	2.4688
Aqp1	aquaporin 1 (Aqp1), mRNA.	0.000115758	0.00664459	2.47532
Ctsf	cathepsin F (Ctsf), mRNA.	2.7202e-10	3.88123e-06	2.49756
Htra1	HtrA serine peptidase 1 (Htra1), mRNA.	4.25798e-06	0.00143794	2.5122
Ebf2	early B-cell factor 2 (Ebf2), mRNA.	0.000558515	0.0174813	2.51642
Serpinf1	serine (or cysteine) peptidase inhibitor, clade F, member 1 (Serpinf1), mRNA.	0.00280931	0.0454762	2.52798
Meox2	mesenchyme homeobox 2 (Meox2), mRNA.	0.000210034	0.00970968	2.52823
Scube2	signal peptide, CUB domain, EGF-like 2 (Scube2), mRNA.	2.38649e-05	0.00322767	2.54406
Igfbp4		1.10585e-05	0.00210497	2.55543
Mfap2	microfibrillar-associated protein 2 (Mfap2), mRNA.	1.17299e-05	0.00212736	2.57621
Rasl11b	RAS-like, family 11, member B (Rasl11b), mRNA.	1.72819e-05	0.00261874	2.59569
Dcn	decorin (Dcn), mRNA.	1.02409e-05	0.00203276	2.60062
Mfap2	microfibrillar-associated protein 2 (Mfap2), mRNA.	7.57945e-06	0.00178616	2.61515
Htra1	HtrA serine peptidase 1 (Htra1), mRNA.	6.75465e-08	0.00019286	2.61612
Ctsk	cathepsin K (Ctsk), mRNA.	3.34081e-05	0.00372012	2.63234
Mglap	matrix Gla protein (Mgp), mRNA.	5.85524e-05	0.00474644	2.64406
Kera	keratocan (Kera), mRNA.	1.34312e-05	0.0022334	2.67653
2610027C15Rik	RIKEN cDNA 2610027C15 gene (2610027C15Rik), mRNA.	1.22618e-05	0.00214874	2.71522
4832406C22	family with sequence similarity 132, member B (Fam132b), mRNA.	8.82023e-05	0.00586739	2.72027
Myh8	myosin, heavy polypeptide 8, skeletal muscle, perinatal (Myh8), mRNA.	6.6164e-07	0.000592197	2.74388
Col1a1	collagen, type I, alpha 1 (Col1a1), mRNA.	3.44135e-05	0.00374129	2.74652
Adamts2	a disintegrin-like and metallopeptidase (reprolysin type) with thrombospondin type 1 motif, 2 (Adamts2), mRNA.	1.60132e-06	0.000839776	2.76008
B230399E16Rik	RIKEN cDNA B230399E16 gene (B230399E16Rik), mRNA.	7.03417e-05	0.0052853	2.77067
Fmod	fibromodulin (Fmod), mRNA.	1.96876e-06	0.000936875	2.83624
Mfap5	microfibrillar associated protein 5 (Mfap5), mRNA.	0.000281611	0.0117938	2.83652
Meox1	mesenchyme homeobox 1 (Meox1), mRNA.	4.94418e-06	0.00143794	2.86835
Ppap2b	phosphatidic acid phosphatase type 2B (Ppap2b), mRNA.	1.47307e-07	0.000315445	2.87031
Thbs2	thrombospondin 2 (Thbs2), mRNA.	6.82084e-05	0.00518565	2.89468
Tnxb	tenascin XB (Tnxb), mRNA.	2.71059e-05	0.0034492	2.90547
Fmod	fibromodulin (Fmod), mRNA.	3.73424e-06	0.00143794	2.94874
Pdgfra	platelet derived growth factor receptor, alpha polypeptide (Pdgfra), transcript variant 1, mRNA.	6.68316e-07	0.000592197	2.96887
Nfatc4	nuclear factor of activated T-cells, cytoplasmic, calcineurin-dependent 4 (Nfatc4), mRNA.	2.65657e-07	0.000371838	2.97834
Mfap4	microfibrillar-associated protein 4 (Mfap4), mRNA.	7.79236e-06	0.00180397	3.00887
Tnxb	tenascin XB (Tnxb), mRNA.	0.000336026	0.0129895	3.12565
Tnxb	tenascin XB (Tnxb), mRNA.	5.53394e-05	0.00465286	3.14372
Adamts2	a disintegrin-like and metallopeptidase (reprolysin type) with thrombospondin type 1 motif, 2 (Adamts2), mRNA.	5.24294e-06	0.00143794	3.14622
Igfbp6	insulin-like growth factor binding protein 6 (Igfbp6), mRNA.	1.03506e-07	0.000265979	3.14966
Sult1a1	sulfotransferase family 1A, phenol-preferring, member 1 (Sult1a1), mRNA.	3.082e-05	0.00360035	3.15303
Adh1	alcohol dehydrogenase 1 (class I) (Adh1), mRNA.	5.05082e-06	0.00143794	3.16867
Actn3	actinin alpha 3 (Actn3), mRNA.	1.23724e-07	0.00028903	3.20155
Olfml3	olfactomedin-like 3 (Olfml3), mRNA.	6.20166e-05	0.00490351	3.24268
Adh1	alcohol dehydrogenase 1 (class I) (Adh1), mRNA.	9.48426e-06	0.00195545	3.37088
Spon2	spondin 2, extracellular matrix protein (Spon2), mRNA.	3.81675e-05	0.00393806	3.92835
Sln	sarcolipin (Sln), mRNA.	3.02077e-10	3.88123e-06	9.48357
