# Supplementary material for: Loss of Ptpn11 (Shp2) drives satellite cells into quiescence
Source: eLife. 2017 May 2;6:e21552. doi: 10.7554/eLife.21552 (PMC5441871; doi:10.7554/eLife.21552)
Supplement: Supplementary file 2. — Enriched GO terms in deregulated genes in Ptpn11 mutant muscle stem cells. FDR: false discovery rate. Corrected p-values (q-value) was determined as described (Hochberg and Benjamini, 1990). DOI: http://dx.doi.org/10.7554/eLife.21552.020 [file elife-21552-supp2.xlsx]

## Sheet: GO-Term enrichment
Supplemental file 2
Enriched process-associated GO terms for down-regulated transcripts					Enriched process-associated GO terms for up-regulated transcripts
GO term	Description	p-value	FDR q-value		GO term	Description	p-value	FDR q-value
GO:1903047	mitotic cell cycle process	5.63e-34	7.11e-30		GO:0030198	extracellular matrix organization	2.38e-12	3.01e-08
GO:0022402	cell cycle process	2.13e-31	1.35e-27		GO:0043062	extracellular structure organization	2.86e-12	1.81e-08
GO:0007049	cell cycle	2.04e-28	8.59e-25		GO:0030334	regulation of cell migration	1.61e-11	6.79e-08
GO:0007067	mitotic nuclear division	2.46e-27	7.76e-24		GO:0048856	anatomical structure development	8.32e-11	2.63e-07
GO:0000280	nuclear division	1.13e-26	2.86e-23		GO:0051270	regulation of cellular component movement	8.38e-11	2.12e-07
GO:0048285	organelle fission	3.07e-26	6.45e-23		GO:2000145	regulation of cell motility	8.71e-11	1.83e-07
GO:0051301	cell division	4.66e-26	8.41e-23		GO:0040012	regulation of locomotion	9.92e-11	1.79e-07
GO:0006259	DNA metabolic process	1.63e-19	2.57e-16		GO:0045765	regulation of angiogenesis	5.71e-10	9.01e-07
GO:0051276	chromosome organization	2.47e-18	3.47e-15
GO:0090304	nucleic acid metabolic process	2.49e-17	3.14e-14
GO:0007059	chromosome segregation	1.65e-16	1.89e-13
GO:0046483	heterocycle metabolic process	8.15e-16	8.58e-13
GO:0006725	cellular aromatic compound metabolic process	1.05e-15	1.02e-12
GO:0006139	nucleobase-containing compound metabolic process	1.84e-15	1.66e-12
GO:1901360	organic cyclic compound metabolic process	4.45e-15	3.75e-12		Enriched GO terms were identified with the GOrilla tool using the standard settings
GO:0010564	regulation of cell cycle process	5.77e-13	4.56e-10		provided (Eden, 2009).
GO:0051726	regulation of cell cycle	1.37e-12	1.02e-09
GO:0006260	DNA replication	1.43e-12	1e-09		Only enriched GO terms with an adjusted q-value below 1.0 x 10-6 are displayed.
GO:0034641	cellular nitrogen compound metabolic process	1.47e-12	9.8e-10
GO:0006996	organelle organization	1.97e-12	1.24e-09
GO:0006807	nitrogen compound metabolic process	9.28e-12	5.58e-09
GO:0044260	cellular macromolecule metabolic process	9.94e-12	5.71e-09
GO:0007346	regulation of mitotic cell cycle	1.25e-11	6.84e-09
GO:0006974	cellular response to DNA damage stimulus	1.11e-10	5.82e-08
GO:0043170	macromolecule metabolic process	2.57e-10	1.3e-07
GO:0030261	chromosome condensation	5.15e-10	2.5e-07
GO:0051052	regulation of DNA metabolic process	1.11e-09	5.2e-07
