# Supplementary material for: Loss of Ptpn11 (Shp2) drives satellite cells into quiescence
Source: eLife. 2017 May 2;6:e21552. doi: 10.7554/eLife.21552 (PMC5441871; doi:10.7554/eLife.21552)
Supplement: Supplementary file 3. — Shown are the definition of the center, the error bars, the statistical test used, n-numbers for each genotype or treatment for a specific developmental stage and the corresponding p-value for each comparison. S.E.M.: standard error of the mean. DOI: http://dx.doi.org/10.7554/eLife.21552.021 [file elife-21552-supp3.xlsx]

## Sheet: Sheet1
				N per genotype/ treatment						p-value
Figure	Definition of Center	Error bars	Statistical test	Shp2flox/flox	Ctrl	coShp2/ GS493				Shp2flox/flox vs. coShp2	Ctrl vs. coShp2/ GS493				Shp2flox/flox vs. coShp2	Ctrl vs. coShp2/ GS493
1c	mean	standard error of the mean	unpaired, two-tailed T-test	-	P0: 4; P7: 3; P14: 4	P0: 3; P7: 4; P14: 4				-	P0: 0.03340; P7: 0.00082; P14: 0.00015				-
2b	mean	standard error of the mean	unpaired, two-tailed T-test	E16: 4; E18: 3; P0: 3; P7: 3	E16: 3; E18: 3; P0: 3; P7: 3	E16: 3; E18: 3; P0: 3; P7: 3				E16: 0.3093; E18: 0.00204; P0: 0.00078; P7: 0.00003	E16: 0.049; E18: 0.00039; P0: 0.0002; P7: 0.0019
2d	mean	standard error of the mean	unpaired, two-tailed T-test	-	E16: 4; E18: 3; P7: 3	E16: 4; E18: 3; P7: 4				-	E16: 0.057; E18: 0.0002; P7: 0.0040				-
2e	mean	standard error of the mean	unpaired, two-tailed T-test	-	E16: 3; E18: 3; P0: 3; P7: 3	E16: 3; E18: 4; P0: 3; P7: 3				-	E16: 0.920; E18: 0.012; P0: 0.0002; P7: 0.0001				-
2g	mean	standard error of the mean	unpaired, two-tailed T-test	-	4	4				-	3.70895e-05				-
2h	mean	standard error of the mean	unpaired, two-tailed T-test	-	3	3				-	0.000129959				-
2j	mean	standard error of the mean	unpaired, two-tailed T-test	-	E14.5: 4; E15.5: 3; P0: 3	E14.5: 3; E15.5: 3; P0: 4				-	E14.5: 0.064726; E15.5: 0.022628; P0: 0.000016				-
2k	mean	standard error of the mean	unpaired, two-tailed T-test	-	E14.5: 4; E15.5: 3; P0: 3	E14.5: 4; E15.5: 3; P0: 3				-	E14.5: 0.383; E15.5: 0.030; P0: 0.012				-
Figure2-figure supplement 1b	mean	standard error of the mean	unpaired, two-tailed T-test	5	5	5				3.86435e-06	3.45762e-08
Figure2-figure supplement 1c	mean	standard error of the mean	unpaired, two-tailed T-test	P0: 3; P7: 3; P14: 3	-	P0: 3; P7: 3; P14: 3				P0: 0.66667; P7: 0.5457; P14: 0.52860	-
3c	mean	standard error of the mean	unpaired, two-tailed T-test	-	4	4				-	0.308205				-
3d	mean	standard error of the mean	unpaired, two-tailed T-test	-	3	3				-	0.683819				-
				N per genotype/ treatment						p-value
Figure	Definition of Center	Error bars	Statistical test	Shp2flox/flox	Pax7CreERT2	TxCtrl/ Ctrl	TxcoShp2/ GS493	TxMek1DD	TxcoShp2; Mek1DD	Shp2flox/flox vs. Pax7CreERT2	Shp2flox/flox vs. TxCtrl	Shp2flox/flox vs. TxcoShp2	Pax7CreERT2 vs. TxCtrl	Pax7CreERT2 vs. TxcoShp2	TxCtrl/ Ctrl vs. TxcoShp2/ GS493	TxCtrl vs. TxMek1DD	TxCtrl vs. TxcoShp2;Mek1DD	TxcoShp2 vs. TxcoShp2;Mek1DD
4d	mean	standard error of the mean	unpaired, two-tailed T-test	-	-	3	3	-	-	-	-	-	-	-	0.212	-	-	-
4e	mean	standard error of the mean	unpaired, two-tailed T-test	-	-	3	3	-	-	-	-	-	-	-	0.0035	-	-	-
4g	mean	standard error of the mean	unpaired, two-tailed T-test	-	-	4	4	3	3	-	-	-	-	-	3.65158e-06	0.0656708	0.0394389	0.00479593
4i	mean	standard error of the mean	unpaired, two-tailed T-test	-	-	4	4	3	3	-	-	-	-	-	4.94916e-05	0.00322818	0.00545747	2.68771e-06
4j	mean	standard error of the mean	unpaired, two-tailed T-test	-	-	3	3	3	3	-	-	-	-	-	0.00155154	0.0041758	0.00341057	0.000114979
Figure4-figure supplement 1c	mean	standard error of the mean	unpaired, two-tailed T-test	-	-	3	3	-	-	-	-	-	-	-	exon2+3: 0.0004; exon4+5: 0.0036	-	-	-
Figure4-figure supplement 1f	mean	standard error of the mean	unpaired, two-tailed T-test	-	-	24h: 4; 48h: 4; 72h: 4	24h: 4; 48h: 4; 72h: 4	-	-	-	-	-	-	-	24h: 0.646; 48h: 0.0007; 72h: 0.000004	-	-	-
Figure4-figure supplement 1h	mean	standard error of the mean	unpaired, two-tailed T-test	-	-	6	4	3	3	-	-	-	-	-	0.000509442	8.41123e-06	2.42231e-06	0.00102451
5b	mean	standard error of the mean	unpaired, two-tailed T-test	-	10dpi: 3; 90dpi: 3	10dpi: 3; 90dpi: 4	10dpi: 3; 90dpi: 3	-	-	-	-	-	0.102046	0.0956047	0.857139	-	-	-
5d	median	minimum/ maximum	unpaired, two-tailed T-test comparing all fiber diameters of one genotype against another	-	512 (from 3 animals)	1752 (from 3 animals)	177 (from 3 animals)	-	-	-	-	-	0.329032	5.47676e-96	3.59402e-101	-	-	-
5g	mean	standard error of the mean	unpaired, two-tailed T-test	-	3	3	4	-	-	-	-	-	0.308575	1.28196e-06	0.000603321	-	-	-
Figure5-figure supplement 1a	mean	standard error of the mean	unpaired, two-tailed T-test	0dpi: 3; 10dpi: 3; 90dpi: 3	0dpi: 3; 10dpi: 3; 90dpi: 4	0dpi: 3; 10dpi: 3; 90dpi: 3	0dpi: 3; 10dpi: 3; 90dpi: 4	-	-	0dpi: 0.0004; 10dpi:0.0005 ; 90dpi: 0.0793	0dpi: 0.0031; 10dpi: 0.0005; 90dpi: 0.0093	0dpi: 0.0008; 10dpi: 0.0015; 90dpi: 0.0005	0dpi: 0.071; 10dpi: 0.1020; 90dpi: 0.0159	0dpi: 0.154; 10dpi: 0.0956; 90dpi: 0.0002	0dpi: 0.359; 10dpi: 0.8571; 90dpi: 0.0005	-	-	-
6b	mean	standard error of the mean	unpaired, two-tailed T-test	-	-	10dpi: 3; 90dpi: 3	10dpi: 3; 90dpi: 3	-	-	-	-	-	-	-	10dpi: 0.0001; 90dpi: 0.0017	-	-	-
6d	mean	standard error of the mean	unpaired, two-tailed T-test	-	-	3	3	-	-	-	-	-	-	-	0.0114416	-	-	-
6e	mean	standard error of the mean	unpaired, two-tailed T-test	-	-	4	4	-	-	-	-	-	-	-	3.70895e-05	-	-	-
6f	mean	standard error of the mean	unpaired, two-tailed T-test	-	-	3	3	-	-	-	-	-	-	-	0.000129959	-	-	-
6h	mean	standard error of the mean	unpaired, two-tailed T-test	-	-	3	3	-	-	-	-	-	-	-	0.860365	-	-	-
								-	-
Figure6-figure supplement 1b	mean	standard error of the mean	unpaired, two-tailed T-test	-	-	3	3	-	-	-	-	-	-	-	1	-	-	-
Figure6-figure supplement 1d	mean	standard error of the mean	unpaired, two-tailed T-test	-	-	3	3	-	-	-	-	-	-	-	0.557325	-	-	-

## Sheet: Sheet1 (2)
				N per genotype/ treatment						p-value
Figure	Definition of Center	Error bars	Statistical test	Ptpn11flox/flox	control/ vehicle	coPtpn11/ GS493				Ptpn11flox/flox vs. coPtpn11	control/vehicle vs. coPtpn11/ GS493				Ptpn11flox/flox vs. coPtpn11	control/ vehicle vs. coPtpn11/ GS493
1c	average	S.E.M.	unpaired, two-tailed T-test	-	P0: 4; P7: 3; P14: 4	P0: 3; P7: 4; P14: 4	-	-	-	-	P0: 0.03340; P7: 0.00082; P14: 0.00015	-	-	-	-	-	-	-
2b	average	S.E.M.	unpaired, two-tailed T-test	E16: 4; E18: 3; P0: 3; P7: 3	E16: 3; E18: 3; P0: 3; P7: 3	E16: 3; E18: 3; P0: 3; P7: 3	-	-	-	E16: 0.3093; E18: 0.00204; P0: 0.00078; P7: 0.00003	E16: 0.049; E18: 0.00039; P0: 0.0002; P7: 0.0019	-	-	-	-	-	-	-
2d	average	S.E.M.	unpaired, two-tailed T-test	-	E16: 4; E18: 3; P7: 3	E16: 4; E18: 3; P7: 4	-	-	-	-	E16: 0.057; E18: 0.0002; P7: 0.0040	-	-	-	-	-	-	-
2e	average	S.E.M.	unpaired, two-tailed T-test	-	E16: 3; E18: 3; P0: 3; P7: 3	E16: 3; E18: 4; P0: 3; P7: 3	-	-	-	-	E16: 0.920; E18: 0.012; P0: 0.0002; P7: 0.0001	-	-	-	-	-	-	-
2g	average	S.E.M.	unpaired, two-tailed T-test	-	E14.5: 4; E15.5: 3; P0: 3	E14.5: 4; E15.5: 3; P0: 3	-	-	-	-	E14.5: 0.383; E15.5: 0.030; P0: 0.012	-	-	-	-	-	-	-
2h	average	S.E.M.	unpaired, two-tailed T-test	-	E14.5: 4; E15.5: 3; P0: 3	E14.5: 3; E15.5: 3; P0: 4	-	-	-	-	E14.5: 0.064726; E15.5: 0.022628; P0: 0.000016	-	-	-	-	-	-	-
2k	average	S.E.M.	unpaired, two-tailed T-test	-	4	4	-	-	-	-	3.70895e-05	-	-	-	-	-	-	-
2l	average	S.E.M.	unpaired, two-tailed T-test	-	3	3	-	-	-	-	0.000129959	-	-	-	-	-	-	-
2-figure supplement 1b	average	S.E.M.	unpaired, two-tailed T-test	5	5	5	-	-	-	3.86435e-06	3.45762e-08	-	-	-	-	-	-	-
2-figure supplement 1d	average	S.E.M.	unpaired, two-tailed T-test	-	3	3	-	-	-	-	0.9656	-	-	-	-	-	-	-
2-figure supplement 1e	average	S.E.M.	unpaired, two-tailed T-test	-	3	3	-	-	-	-	0.8534	-	-	-	-	-	-	-
2-figure supplement 1f	average	S.E.M.	unpaired, two-tailed T-test	-	3	3	-	-	-	-	0.9773	-	-	-	-	-	-	-
2-figure supplement 1g	average	S.E.M.	unpaired, two-tailed T-test	-	3	3	-	-	-	-	0.7411	-	-	-	-	-	-	-
2-figure supplement 2a	average	S.E.M.	unpaired, two-tailed T-test	-	5	4	-	-	-	-	Ptpn11: 0.000003; Pax7: 0.7253; MyoD: 0.2476; MyoG: 0.2879; Atg5: 0.3866; LC3: 0.1846; Ulk1: 0.1083; Prdm16: 0.7488; CD31: 0.3286; Ki67: 0.0254; Mcm2: 0.0436	-	-	-	-	-	-	-
2-figure supplement 2b	average	S.E.M.	unpaired, two-tailed T-test	-	3	3	-	-	-	-	0.7028	-	-	-	-	-	-	-
2-figure supplement 2d	average	S.E.M.	unpaired, two-tailed T-test	-	4	4	-	-	-	-	G0/G1: 0.0023; S: 0.0010; G2/M: 0.0656	-	-	-	-	-	-	-
3b	average	S.E.M.	unpaired, two-tailed T-test	-	4	4	-	-	-	-	0.308205	-	-	-	-	-	-	-
3c	average	S.E.M.	unpaired, two-tailed T-test	-	3	3	-	-	-	-	0.683819	-	-	-	-	-	-	-
				N per genotype/ treatment						p-value
Figure	Definition of Center	Error bars	Statistical test	Ptpn11flox/flox	Pax7CreERT2	Txcontrol/ vehicle	TxcoPtpn11/ GS493	TxMap2k1DD	TxcoPtpn11; Map2k1DD	Ptpn11flox/flox vs. Pax7CreERT2	Ptpn11flox/flox vs. Txcontrol	Ptpn11flox/flox vs. TxcoPtpn11	Pax7CreERT2 vs. Txcontrol	Pax7CreERT2 vs. TxcoPtpn11	Txcontrol/ control vs. TxcoPtpn11/ GS493	Txcontrol vs. TxMap2k1DD	Txcontrol vs. TxcoPtpn11;Map2k1DD	TxcoPtpn11 vs. TxcoPtpn11;Map2k1DD
4d	average	S.E.M.	unpaired, two-tailed T-test	-	-	3	3	-	-	-	-	-	-	-	0.00095	-	-	-
4f	average	S.E.M.	unpaired, two-tailed T-test	-	-	3	3	-	-	-	-	-	-	-	0.212	-	-	-
4g	average	S.E.M.	unpaired, two-tailed T-test	-	-	3	3	-	-	-	-	-	-	-	0.0035	-	-	-
4-figure supplement 1c	average	S.E.M.	unpaired, two-tailed T-test	-	-	3	3	-	-	-	-	-	-	-	exon2+3: 0.0004; exon4+5: 0.0036	-	-	-
5b	average	S.E.M.	unpaired, two-tailed T-test	-	-	3	3	-	-	-	-	-	-	-	0.0034	-	-	-
5d	average	S.E.M.	unpaired, two-tailed T-test	-	-	4	4	3	3	-	-	-	-	-	3.65158e-06	0.0656708	0.0394389	0.00479593
5f	average	S.E.M.	unpaired, two-tailed T-test	-	-	3	3	3	3	-	-	-	-	-	0.00155154	0.0041758	0.00341057	0.000114979
5g	average	S.E.M.	unpaired, two-tailed T-test	-	-	4	4	3	3	-	-	-	-	-	4.94916e-05	0.00322818	0.00545747	2.68771e-06
5-figure supplement 1b	average	S.E.M.	unpaired, two-tailed T-test	-	-	24h: 4; 48h: 4; 72h: 4	24h: 4; 48h: 4; 72h: 4	-	-	-	-	-	-	-	24h: 0.646; 48h: 0.0007; 72h: 0.000004	-	-	-
5-figure supplement 1d	average	S.E.M.	unpaired, two-tailed T-test	-	-	6	4	3	3	-	-	-	-	-	0.000509442	8.41123e-06	2.42231e-06	0.00102451
6c	average	S.E.M.	unpaired, two-tailed T-test	-	10 dpi: 3; 90 dpi: 3	10 dpi: 3; 90 dpi: 4	10 dpi: 3; 90 dpi: 3	-	-	-	-	-	0.102046	0.0956047	0.857139	-	-	-
6d	average	S.E.M.	unpaired, two-tailed T-test	-	-	3-5	5	-	-	-	-	-	-	-	Ptpn11: 0.0037; Pax7: 0.2245; MyoD: 0.0778; MyoG: 0.3950; Atg5: 0.6108; LC3: 0.4782; Ulk1: 0.4235; Prdm16: 0.2107; CD31: 0.3786; Ki67: 0.0050; Mcm2: 0.00002	-	-	-
6f	average	S.E.M.	unpaired, two-tailed T-test	-	-	10 dpi: 3; 90 dpi: 3	10 dpi: 3; 90 dpi: 3	-	-	-	-	-	-	-	10dpi: 0.0001; 90dpi: 0.0017	-	-	-
6-figure supplement 1b	average	S.E.M.	unpaired, two-tailed T-test	0 dpi: 3; 10 dpi: 3; 90 dpi: 3	0 dpi: 3; 10 dpi: 3; 90 dpi: 4	0 dpi: 3; 10 dpi: 3; 90 dpi: 3	0 dpi: 3; 10 dpi: 3; 90 dpi: 4	-	-	0dpi: 0.0004; 10dpi:0.0005 ; 90dpi: 0.0793	0dpi: 0.0031; 10dpi: 0.0005; 90dpi: 0.0093	0dpi: 0.0008; 10dpi: 0.0015; 90dpi: 0.0005	0dpi: 0.071; 10dpi: 0.1020; 90dpi: 0.0159	0dpi: 0.154; 10dpi: 0.0956; 90dpi: 0.0002	0dpi: 0.359; 10dpi: 0.8571; 90dpi: 0.0005	-	-	-
6-figure supplement 1d	average	S.E.M.	unpaired, two-tailed T-test	-	-	3	3	-	-	-	-	-	-	-	0.8743	-	-	-
6-figure supplement 1e	average	S.E.M.	unpaired, two-tailed T-test	-	-	3	3	-	-	-	-	-	-	-	0.851	-	-	-
6-figure supplement 1f	average	S.E.M.	unpaired, two-tailed T-test	-	-	3	3	-	-	-	-	-	-	-	0.7284	-	-	-
7c	median	minimum/ maximum	unpaired, two-tailed T-test comparing all fiber diameters of one genotype against another	-	512 (from 3 animals)	1752 (from 3 animals)	177 (from 3 animals)	-	-	-	-	-	0.329032	5.47676e-96	3.59402e-101	-	-	-
7f	average	S.E.M.	unpaired, two-tailed T-test	-	-	0 dpi: 3; 2.5 dpi: 3; 7 dpi: 3	0 dpi: 3; 2.5 dpi: 3; 7 dpi: 4	-	-	-	-	-	-	-	0 dpi: 0.2895; 2.5 dpi: 0.0002; 7 dpi: 0.0006	-	-	-
7g	average	S.E.M.	unpaired, two-tailed T-test	-	-	0 dpi: 3; 2.5 dpi: 3	0 dpi: 3; 2.5 dpi: 3	-	-	-	-	-	-	-	0 dpi: 0.8743; 2.5 dpi: 0.0341	-	-	-
7h	average	S.E.M.	unpaired, two-tailed T-test	-	-	3	3	-	-	-	-	-	-	-	0.0027	-	-	-
7i	average	S.E.M.	unpaired, two-tailed T-test	-	-	3	3	-	-	-	-	-	-	-	0.0079	-	-	-
7-figure supplement 1c	average	S.E.M.	unpaired, two-tailed T-test	-	-	3	3	-	-	-	-	-	-	-	0.021	-	-	-
8c	average	S.E.M.	unpaired, two-tailed T-test	-	-	3	3	-	-	-	-	-	-	-	0.0114416	-	-	-
8d	average	S.E.M.	unpaired, two-tailed T-test	-	-	4	4	-	-	-	-	-	-	-	3.70895e-05	-	-	-
8e	average	S.E.M.	unpaired, two-tailed T-test	-	-	3	3	-	-	-	-	-	-	-	0.000129959	-	-	-
8g	average	S.E.M.	unpaired, two-tailed T-test	-	-	3	3	-	-	-	-	-	-	-	0.860365	-	-	-
8-figure supplement 1c	average	S.E.M.	unpaired, two-tailed T-test	-	-	3	3	-	-	-	-	-	-	-	0.5573	-	-	-
8-figure supplement 1d	average	S.E.M.	unpaired, two-tailed T-test	-	-	3	3	-	-	-	-	-	-	-	0.7156	-	-	-
8-figure supplement 1e	average	S.E.M.	unpaired, two-tailed T-test	-	-	3	3	-	-	-	-	-	-	-	0.7167	-	-	-
