# Supplementary figures and images for: Loss of Ptpn11 (Shp2) drives satellite cells into quiescence
Source: eLife journal article supplement (doi:10.7554/elife.21552), 2017-05-02

Fig. 1 - figure supplement 1:

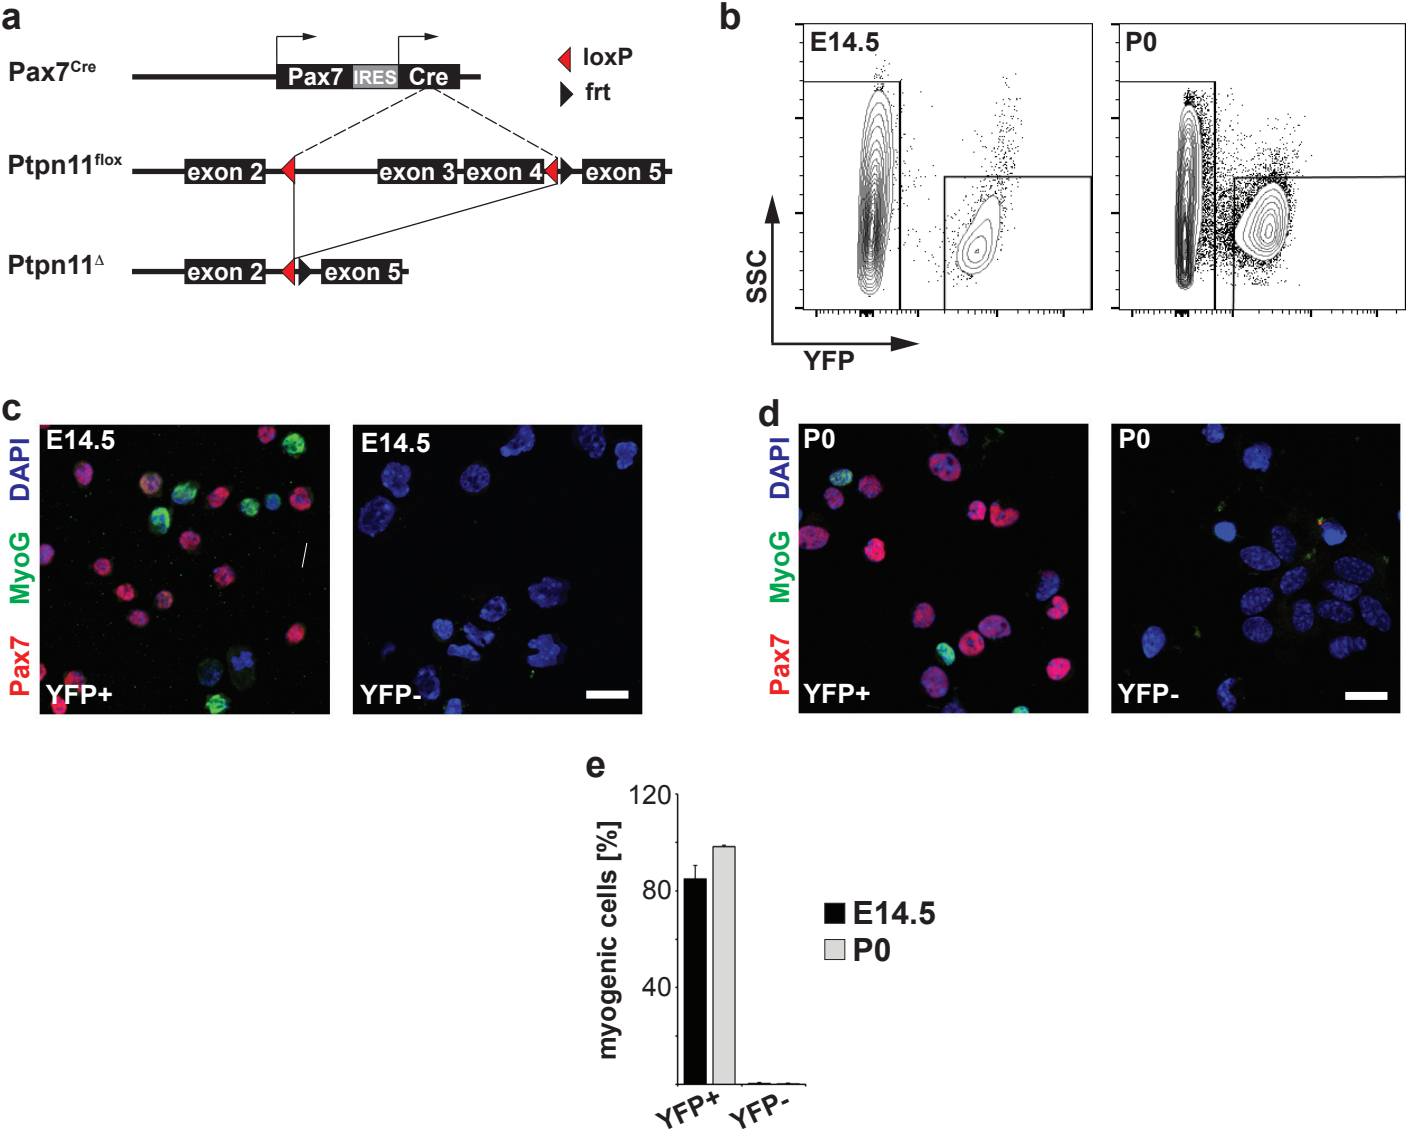

Supplement: supp [file elife_poa_e21552_Figure_1_Figure_Supplement_1.pdf › elife_poa_e21552_Figure_1_Figure_Supplement_1.pdf]

Fig. 2 - figure supplement 1:

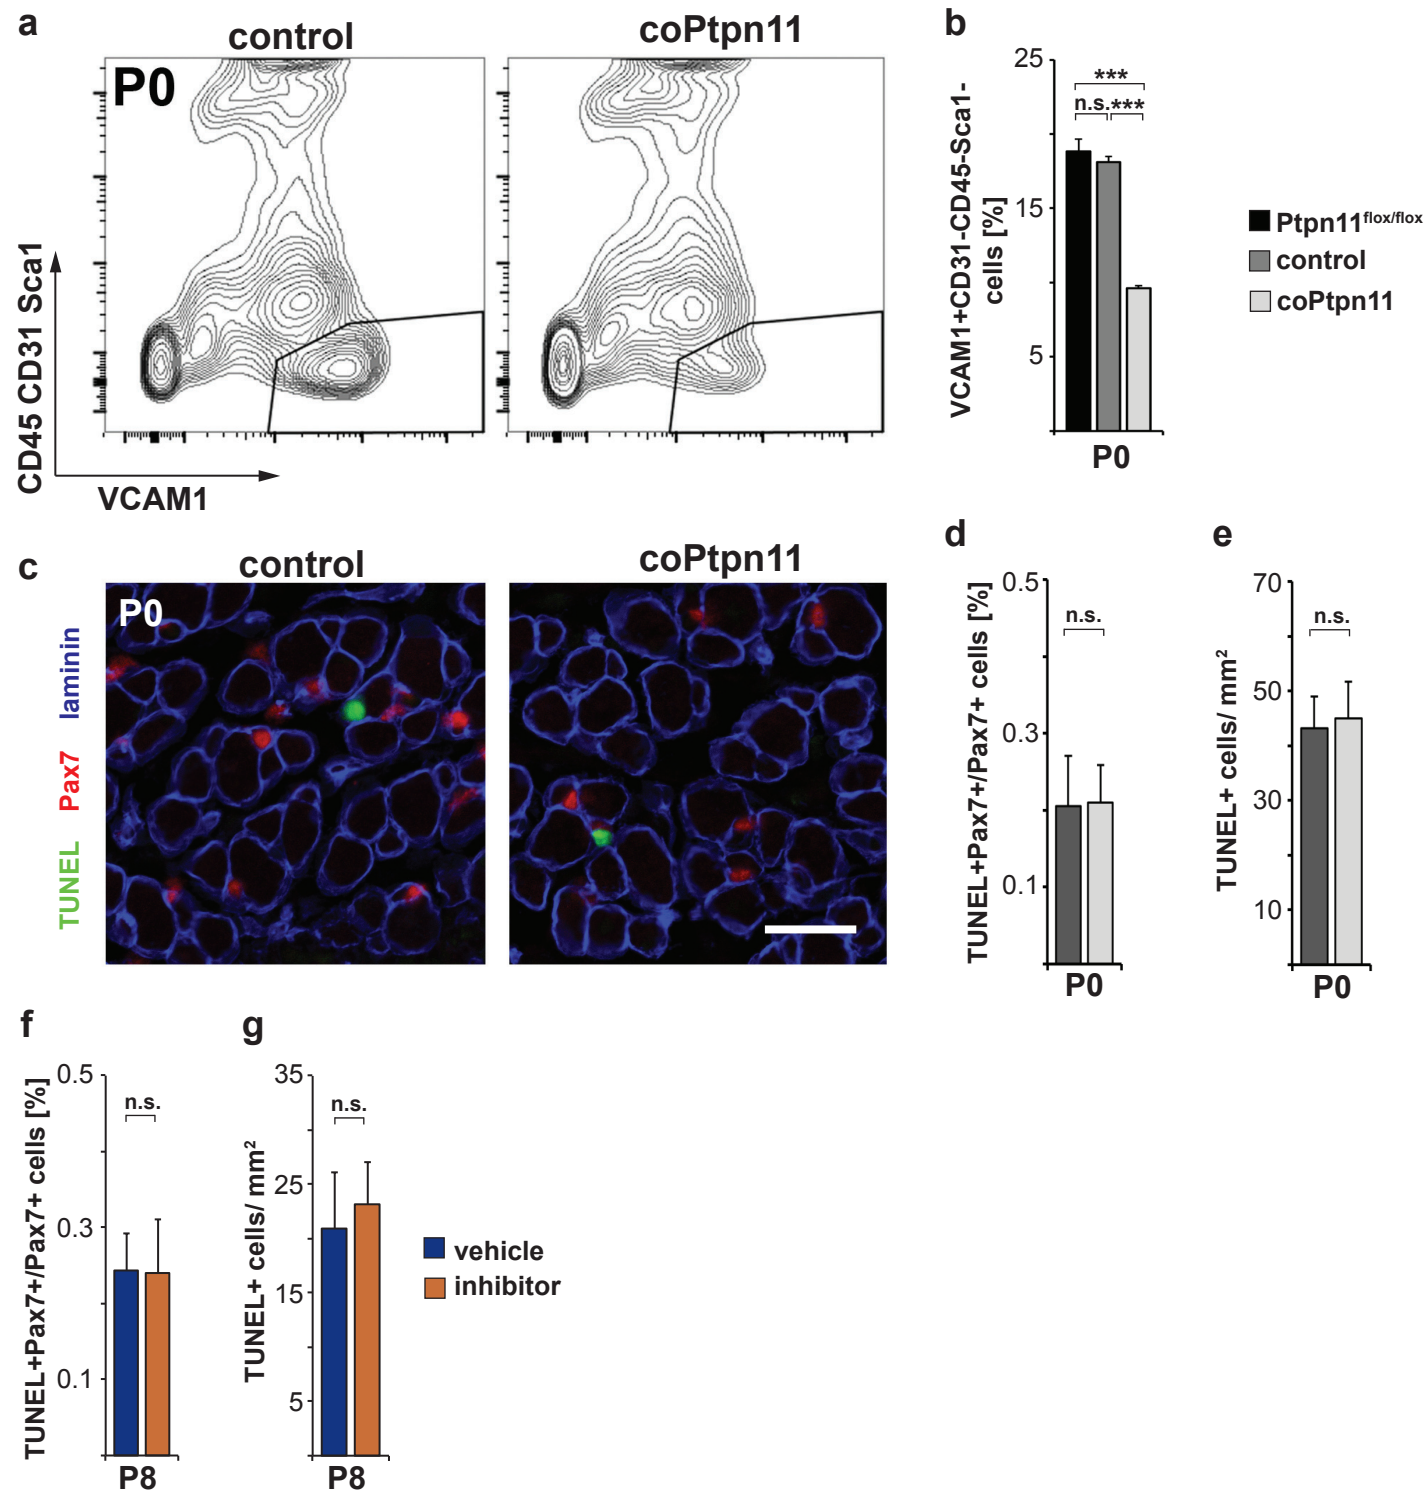

Supplement: supp [file elife_poa_e21552_Figure_2_Figure_Supplement_1.pdf › elife_poa_e21552_Figure_2_Figure_Supplement_1.pdf]

Fig. 2 - figure supplement 2:

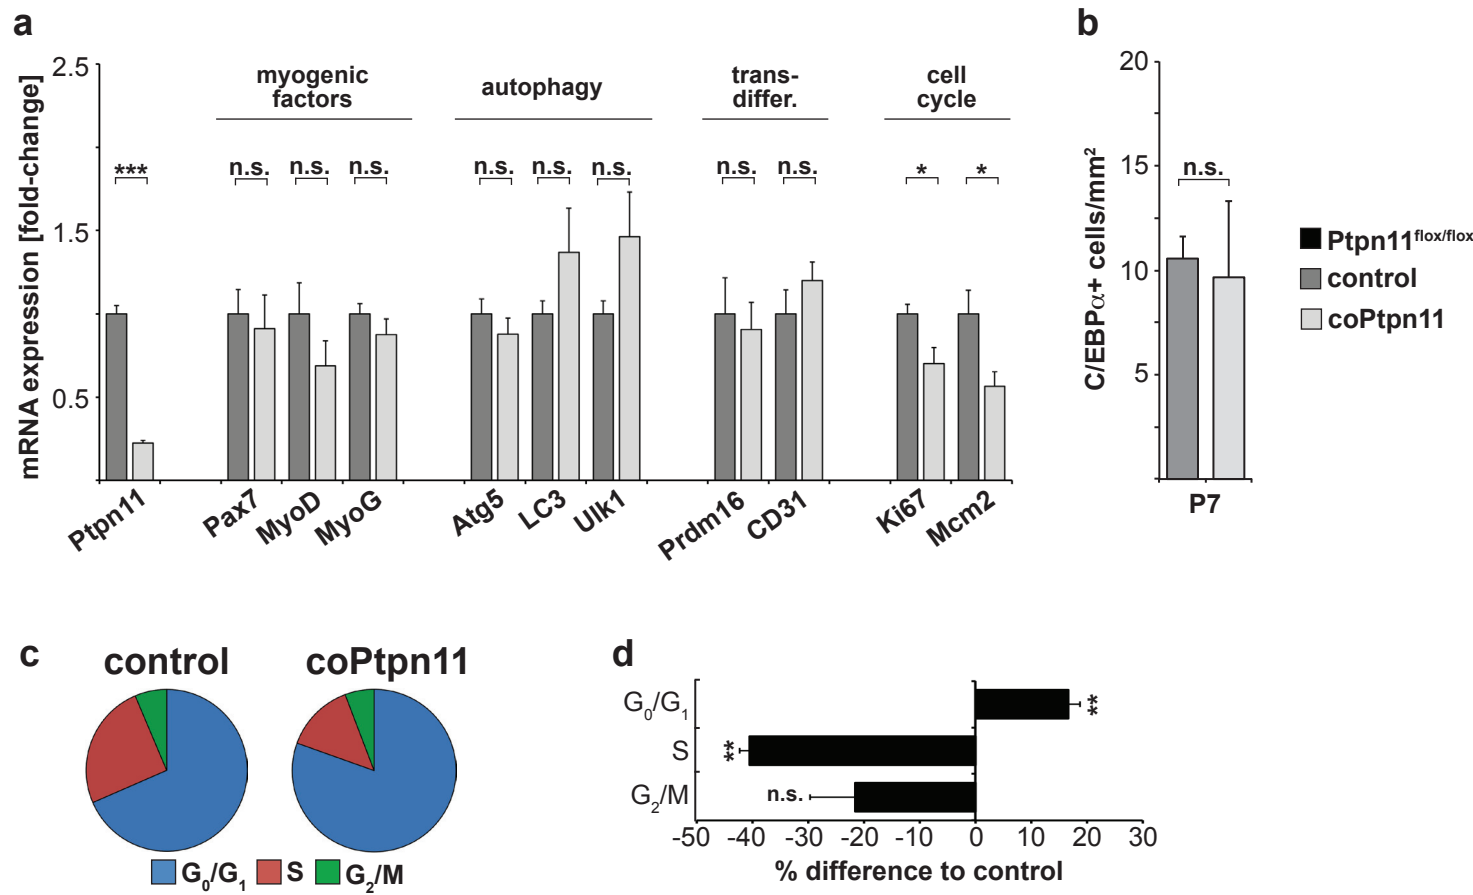

Supplement: supp [file elife_poa_e21552_Figure_2_Figure_Supplement_2.pdf › elife_poa_e21552_Figure_2_Figure_Supplement_2.pdf]

Fig. 4 - figure supplement 1:

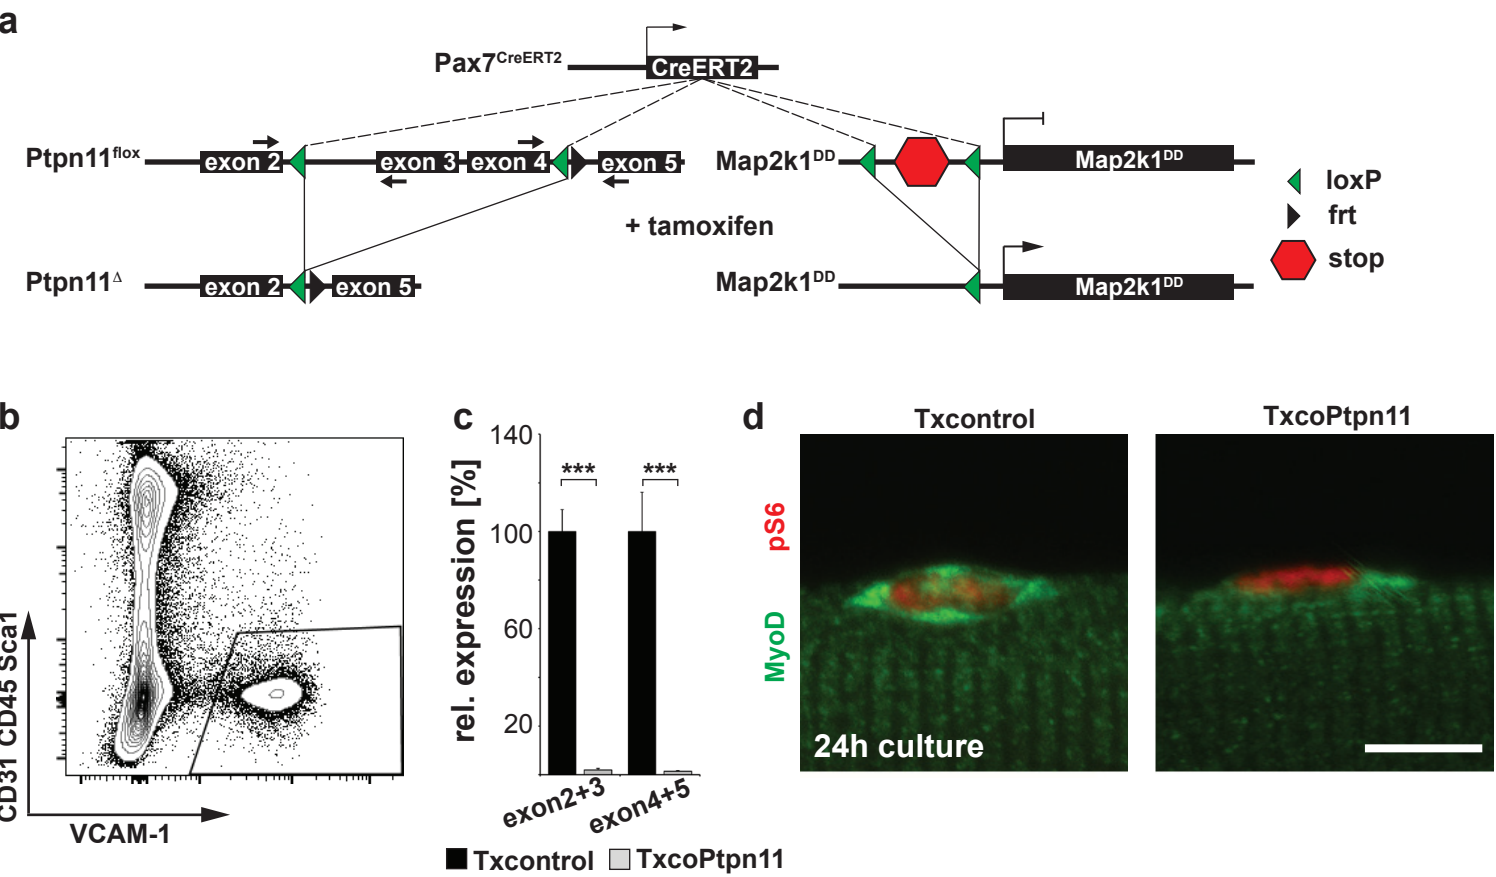

Supplement: supp [file elife_poa_e21552_Figure_4_Figure_Supplement_1.pdf › elife_poa_e21552_Figure_4_Figure_Supplement_1.pdf]

Fig. 5 - figure supplement 1:

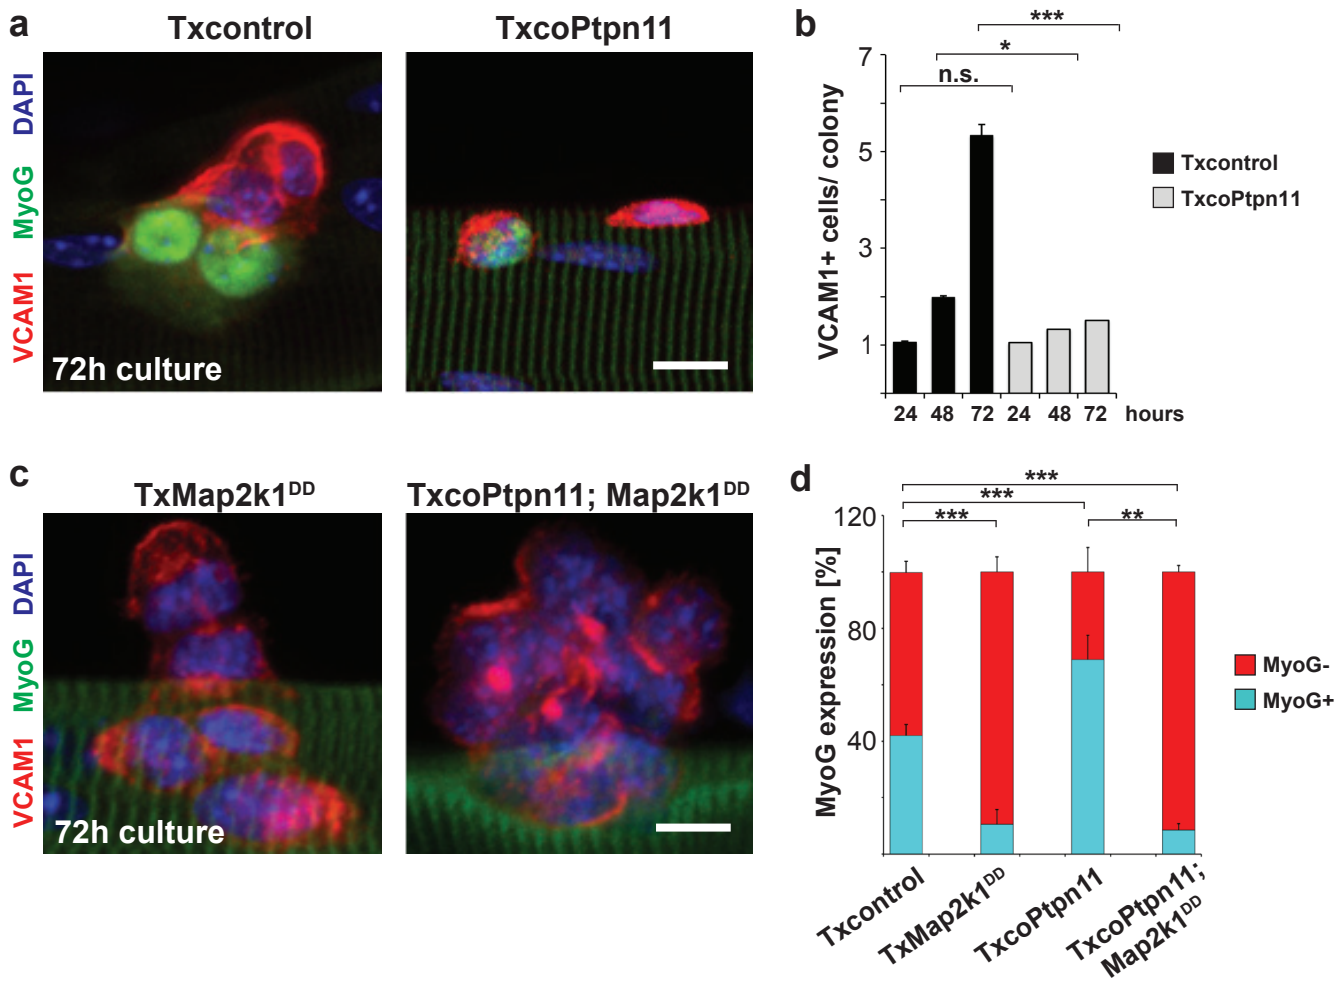

Supplement: supp [file elife_poa_e21552_Figure_5_Figure_Supplement_1.pdf › elife_poa_e21552_Figure_5_Figure_Supplement_1.pdf]

Fig. 6 - figure supplement 1:

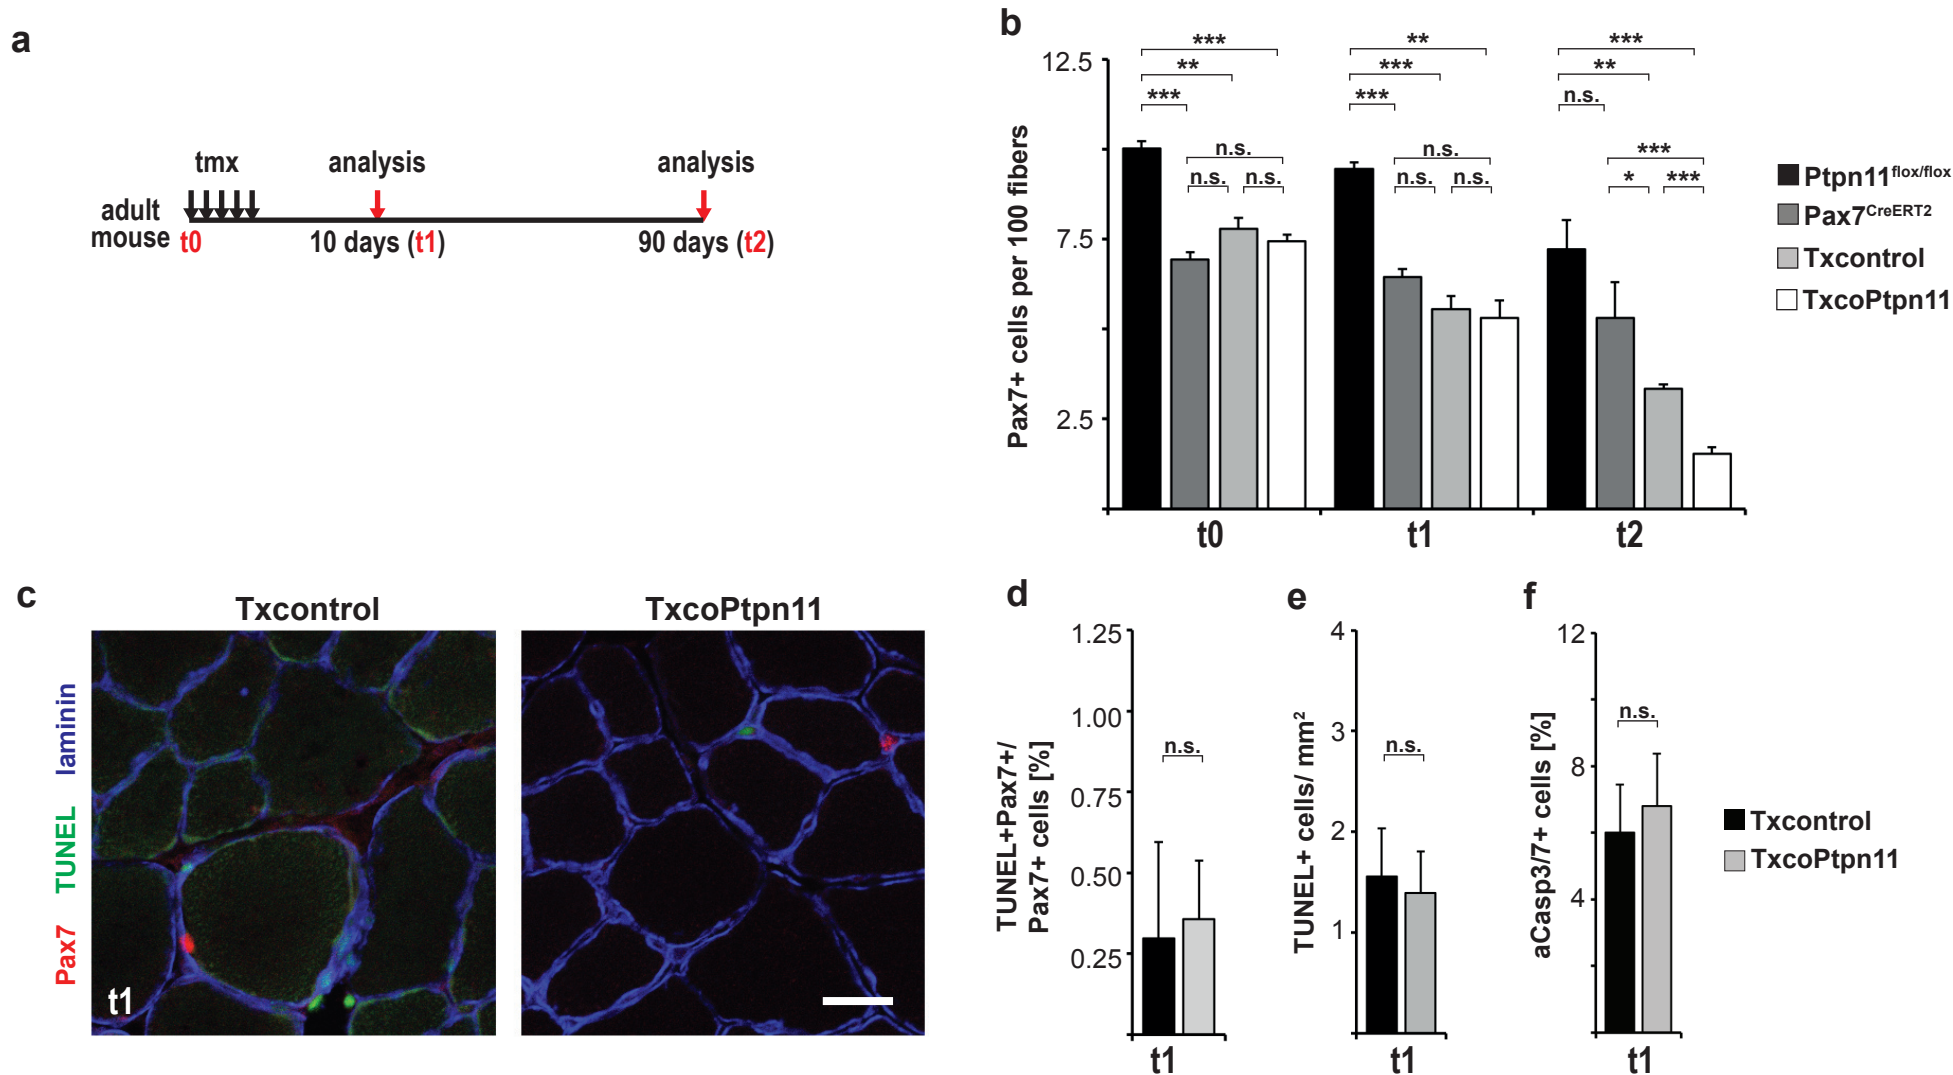

Supplement: supp [file elife_poa_e21552_Figure_6_Figure_Supplement_1.pdf › elife_poa_e21552_Figure_6_Figure_Supplement_1.pdf]

Fig. 7 - figure supplement 1:

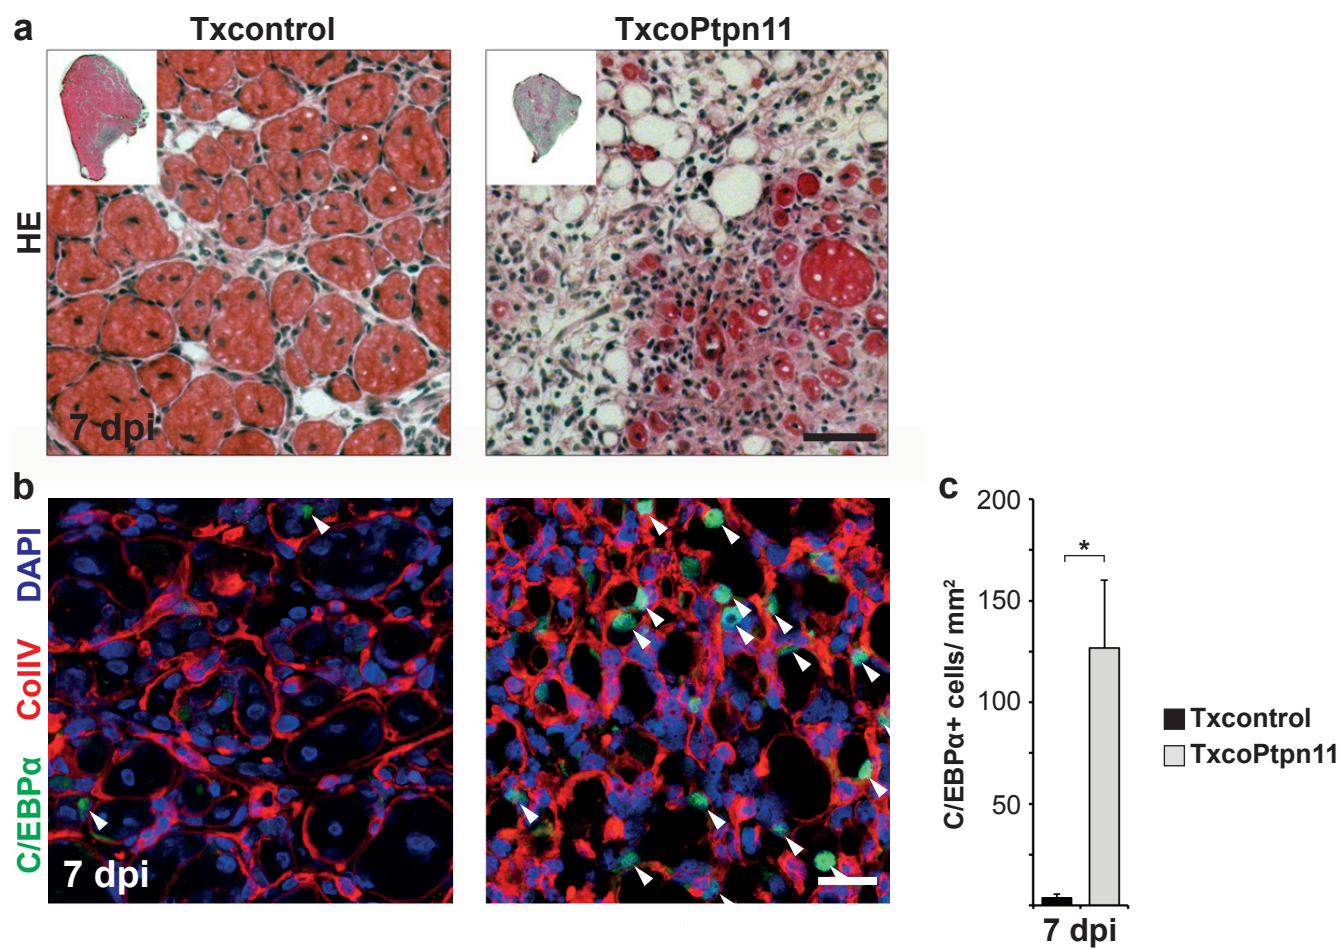

Supplement: supp [file elife_poa_e21552_Figure_7_Figure_Supplement_1.pdf › elife_poa_e21552_Figure_7_Figure_Supplement_1.pdf]

**Fig. 8 - figure supplement 1:**

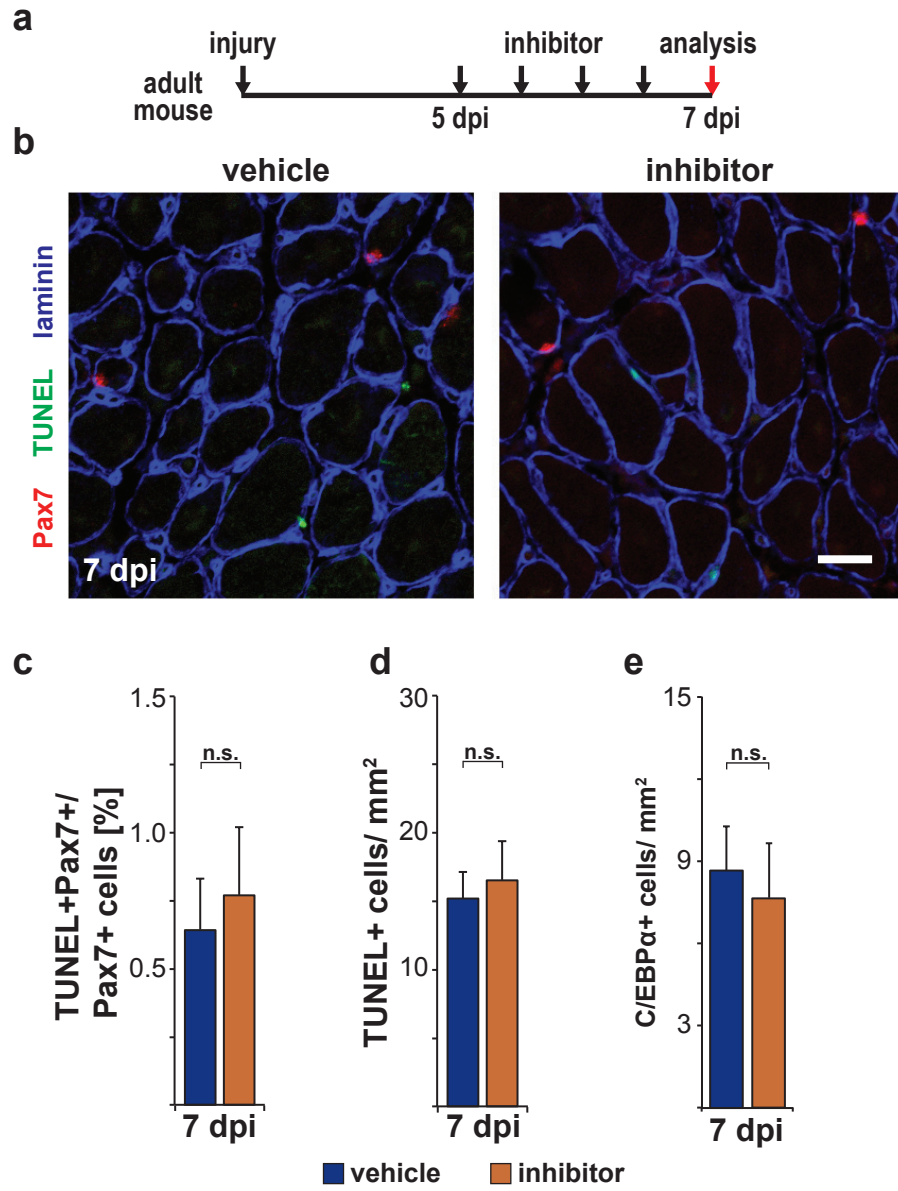

Supplement: supp [file elife_poa_e21552_Figure_8_Figure_Supplement_1.pdf › elife_poa_e21552_Figure_8_Figure_Supplement_1.pdf]
